# Supplementary material for: Structural mapping of oligomeric intermediates in an amyloid assembly pathway
Source: eLife journal article supplement (doi:10.7554/elife.46574), 2019-09-25
Supplement: supp [file elife-46574-supp-v1.zip]

Archive with 18 entries (18 files):
- elife_poa_e46574_Figure_3_figure_supplement_1.tif
- elife_poa_e46574_Figure_6_figure_supplement_1.tif
- elife_poa_e46574_Figure_2_figure_supplement_1.tif
- elife_poa_e46574_Figure_5_figure_supplement_6.tif
- elife_poa_e46574_Video_1.mov
- elife_poa_e46574_Figure_4_figure_supplement_1.tif
- elife_poa_e46574_Figure_3_figure_supplement_2.tif
- elife_poa_e46574_Figure_5_figure_supplement_1.tif
- elife_poa_e46574_Figure_5_figure_supplement_3.tif
- elife_poa_e46574_Figure_5_figure_supplement_2.tif
- elife_poa_e46574_Figure_8_figure_supplement_2.tif
- elife_poa_e46574_Figure_7_figure_supplement_1.tif
- elife_poa_e46574_Figure_8_figure_supplement_1.tif
- elife_poa_e46574_Figure_5_figure_supplement_5.tif
- elife_poa_e46574_Video_2.mov
- elife_poa_e46574_Transparent_Reporting_File.pdf
- elife_poa_e46574_Figure_2_figure_supplement_2.tif
- elife_poa_e46574_Figure_5_figure_supplement_4.tif
