# Supplementary figures and images for: Structural mapping of oligomeric intermediates in an amyloid assembly pathway
Source: eLife journal article supplement (doi:10.7554/elife.46574), 2019-09-25

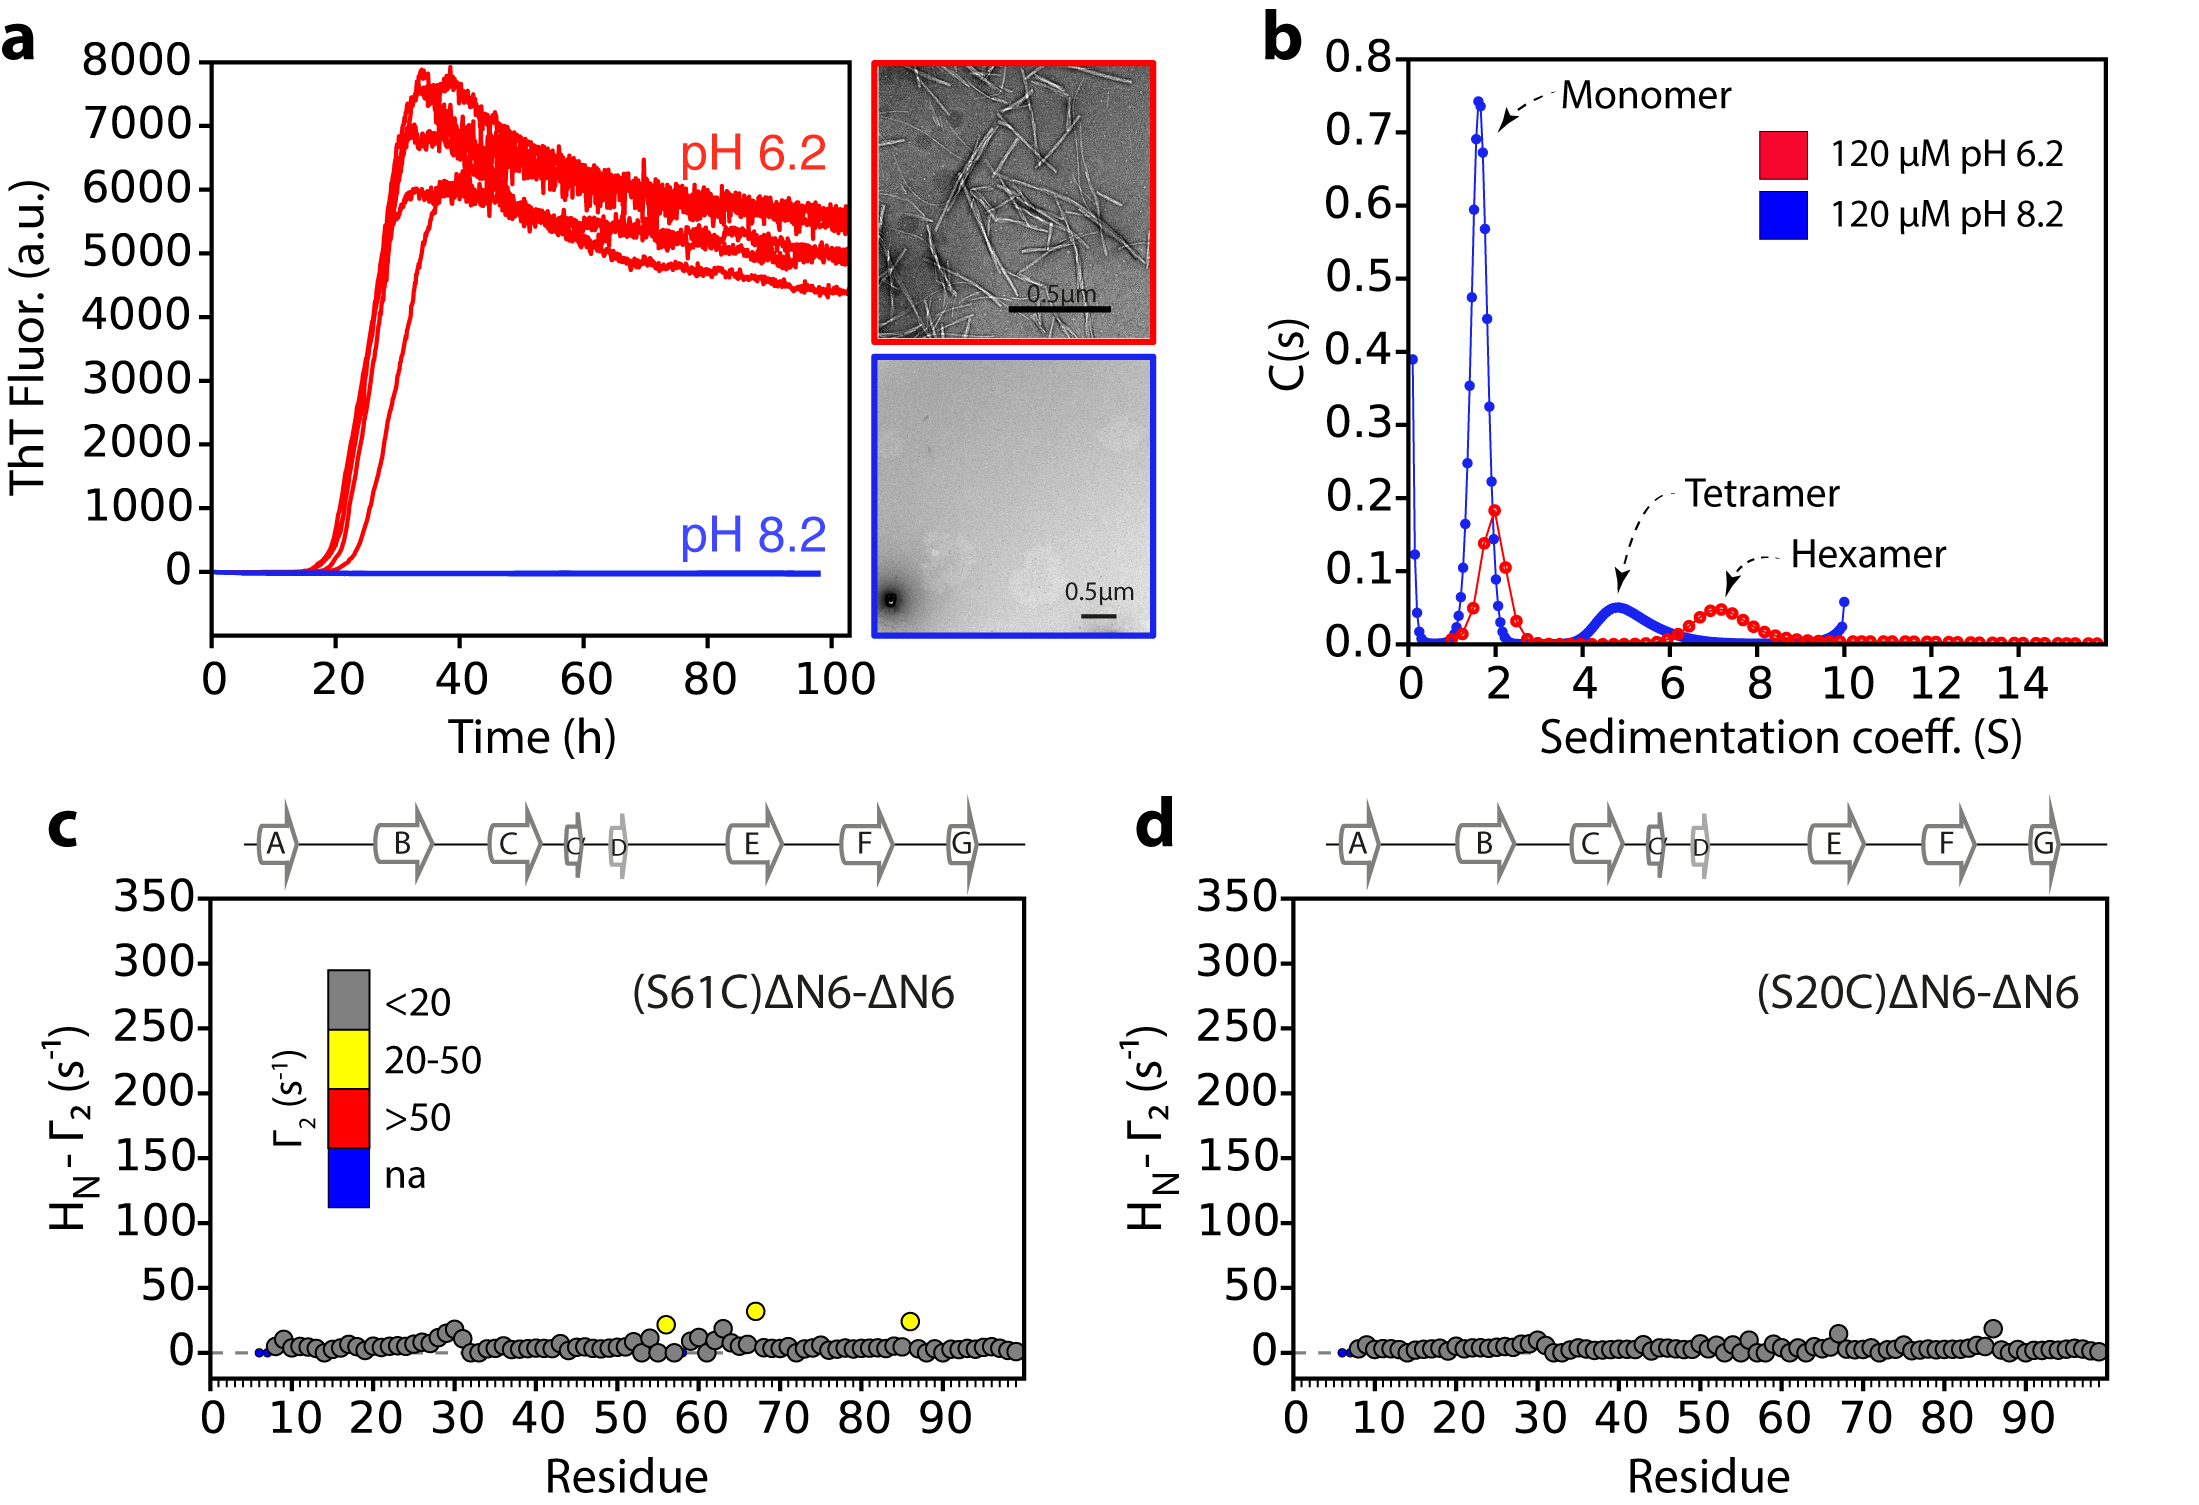

Supplement: supp [file elife-46574-supp-v1.zip › elife_poa_e46574_Figure_3_figure_supplement_1.tif]

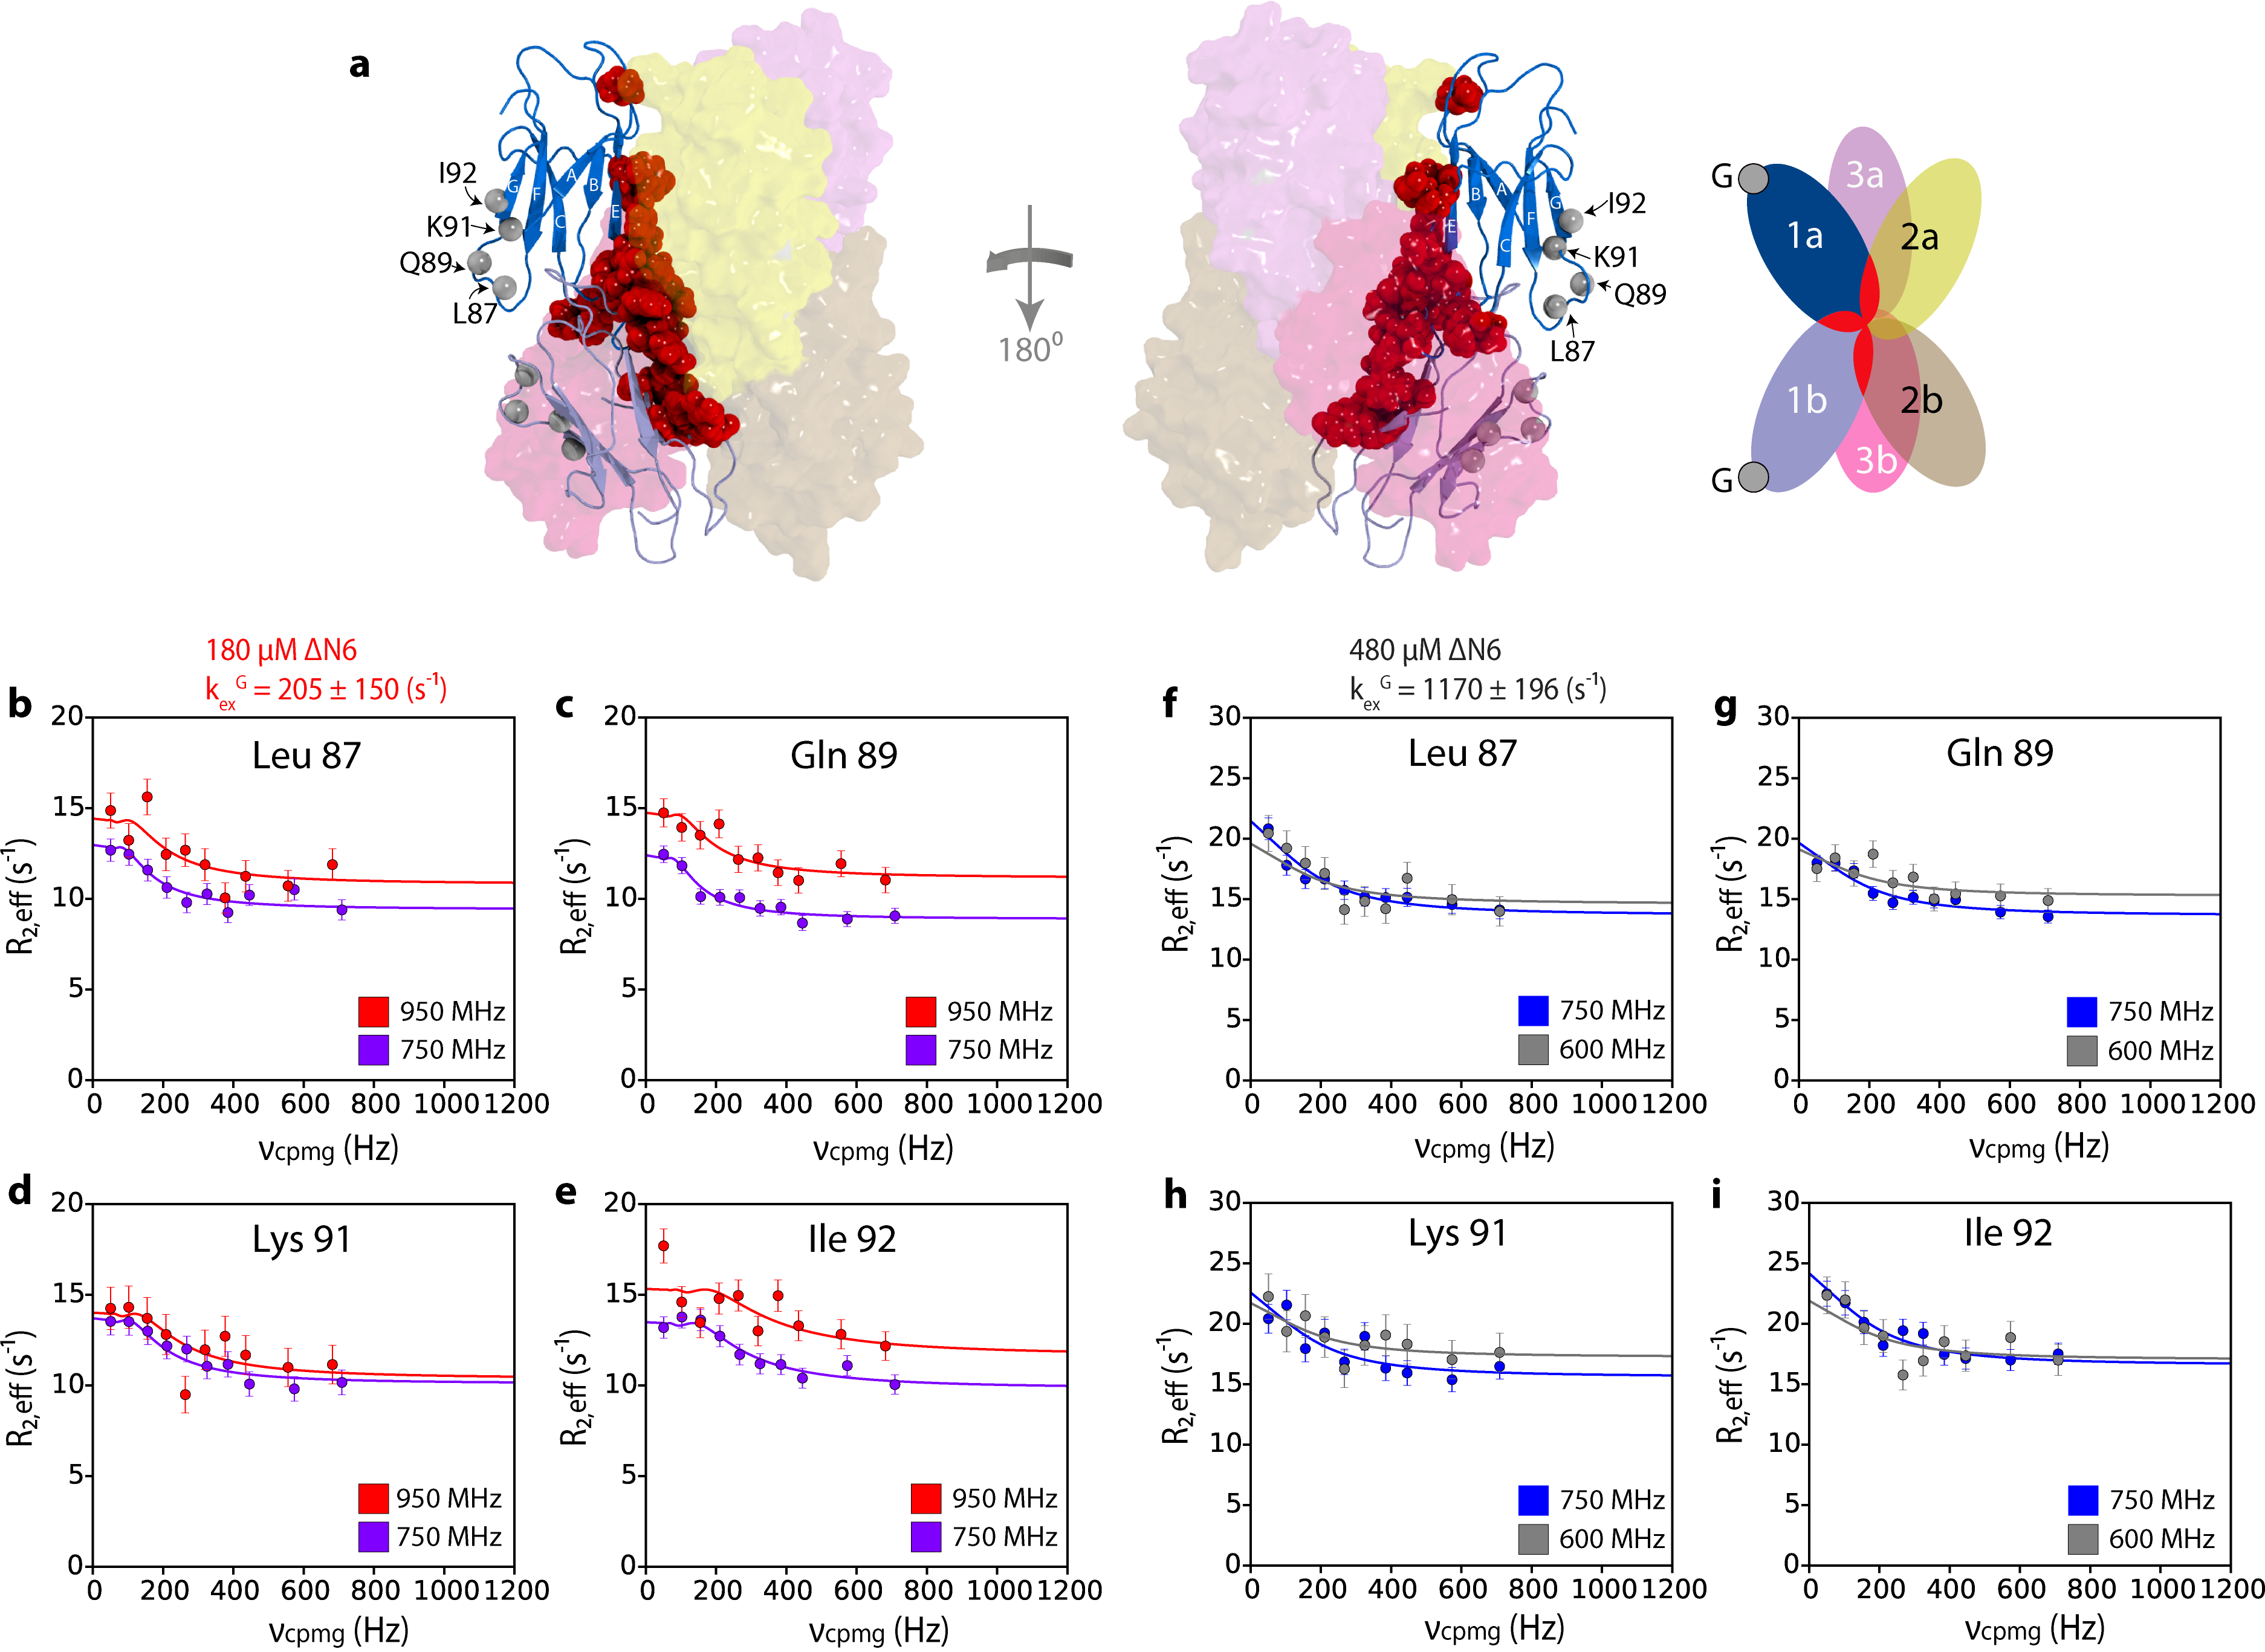

Supplement: supp [file elife-46574-supp-v1.zip › elife_poa_e46574_Figure_6_figure_supplement_1.tif]

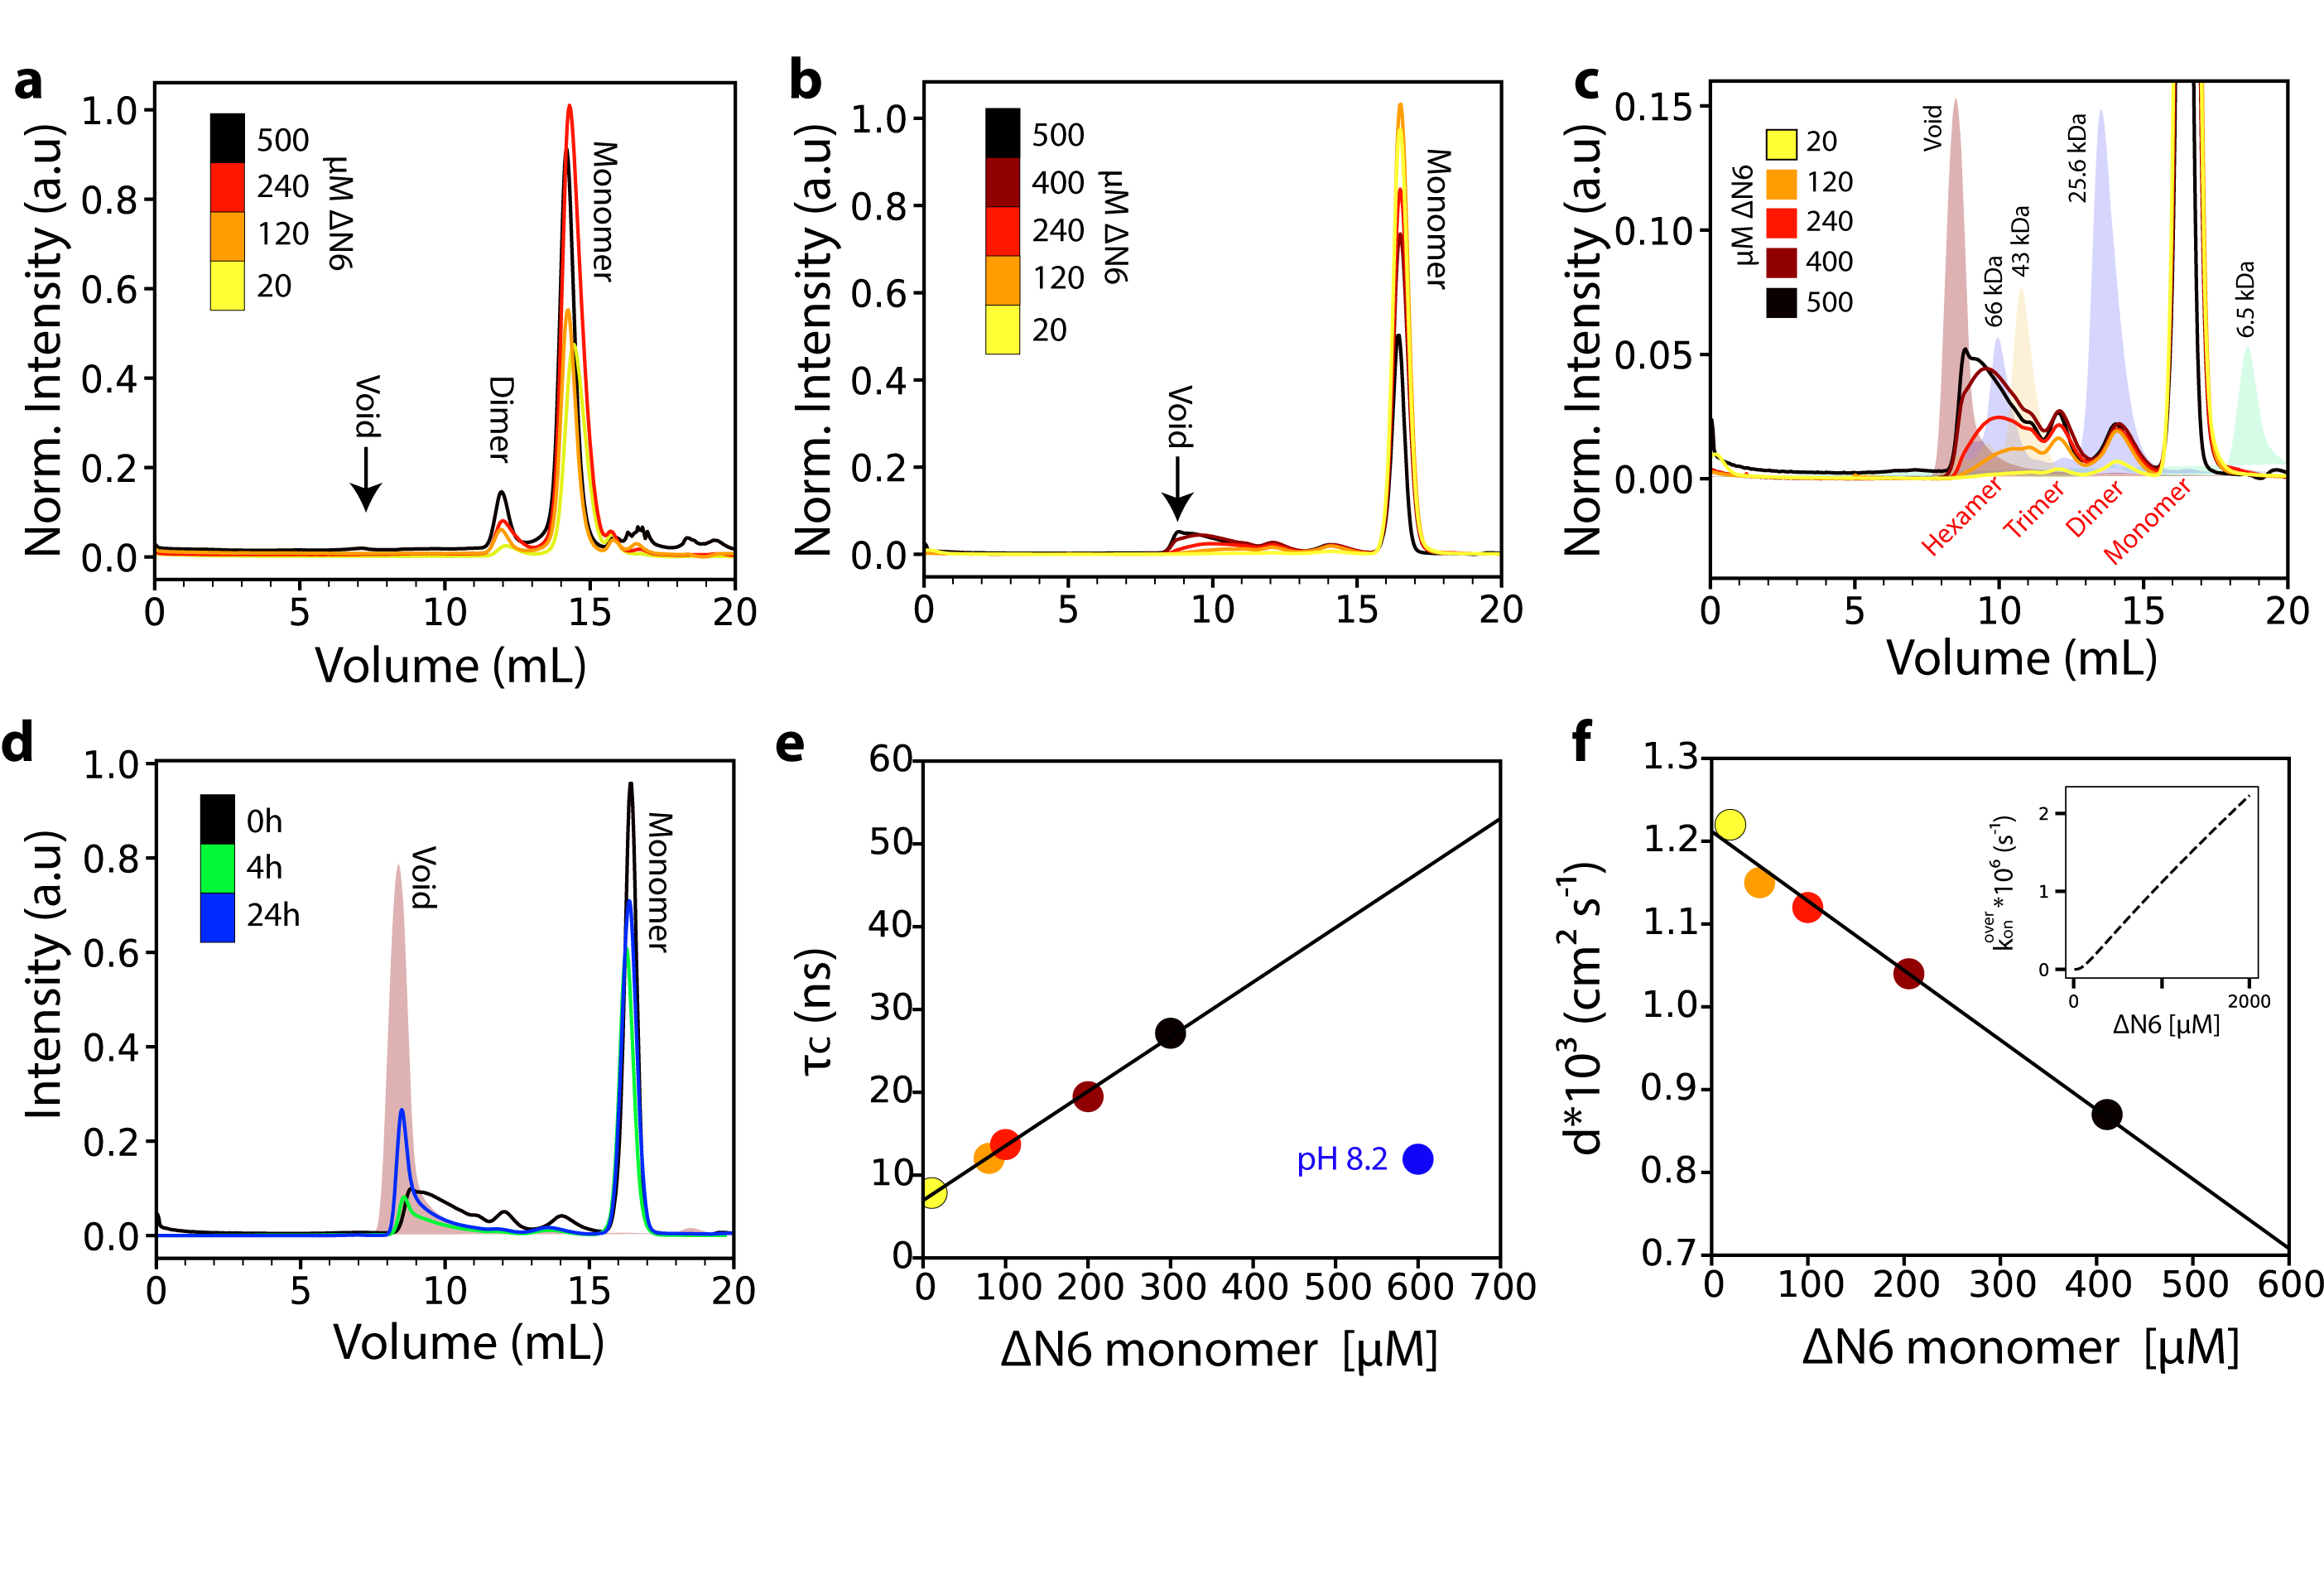

Supplement: supp [file elife-46574-supp-v1.zip › elife_poa_e46574_Figure_2_figure_supplement_1.tif]

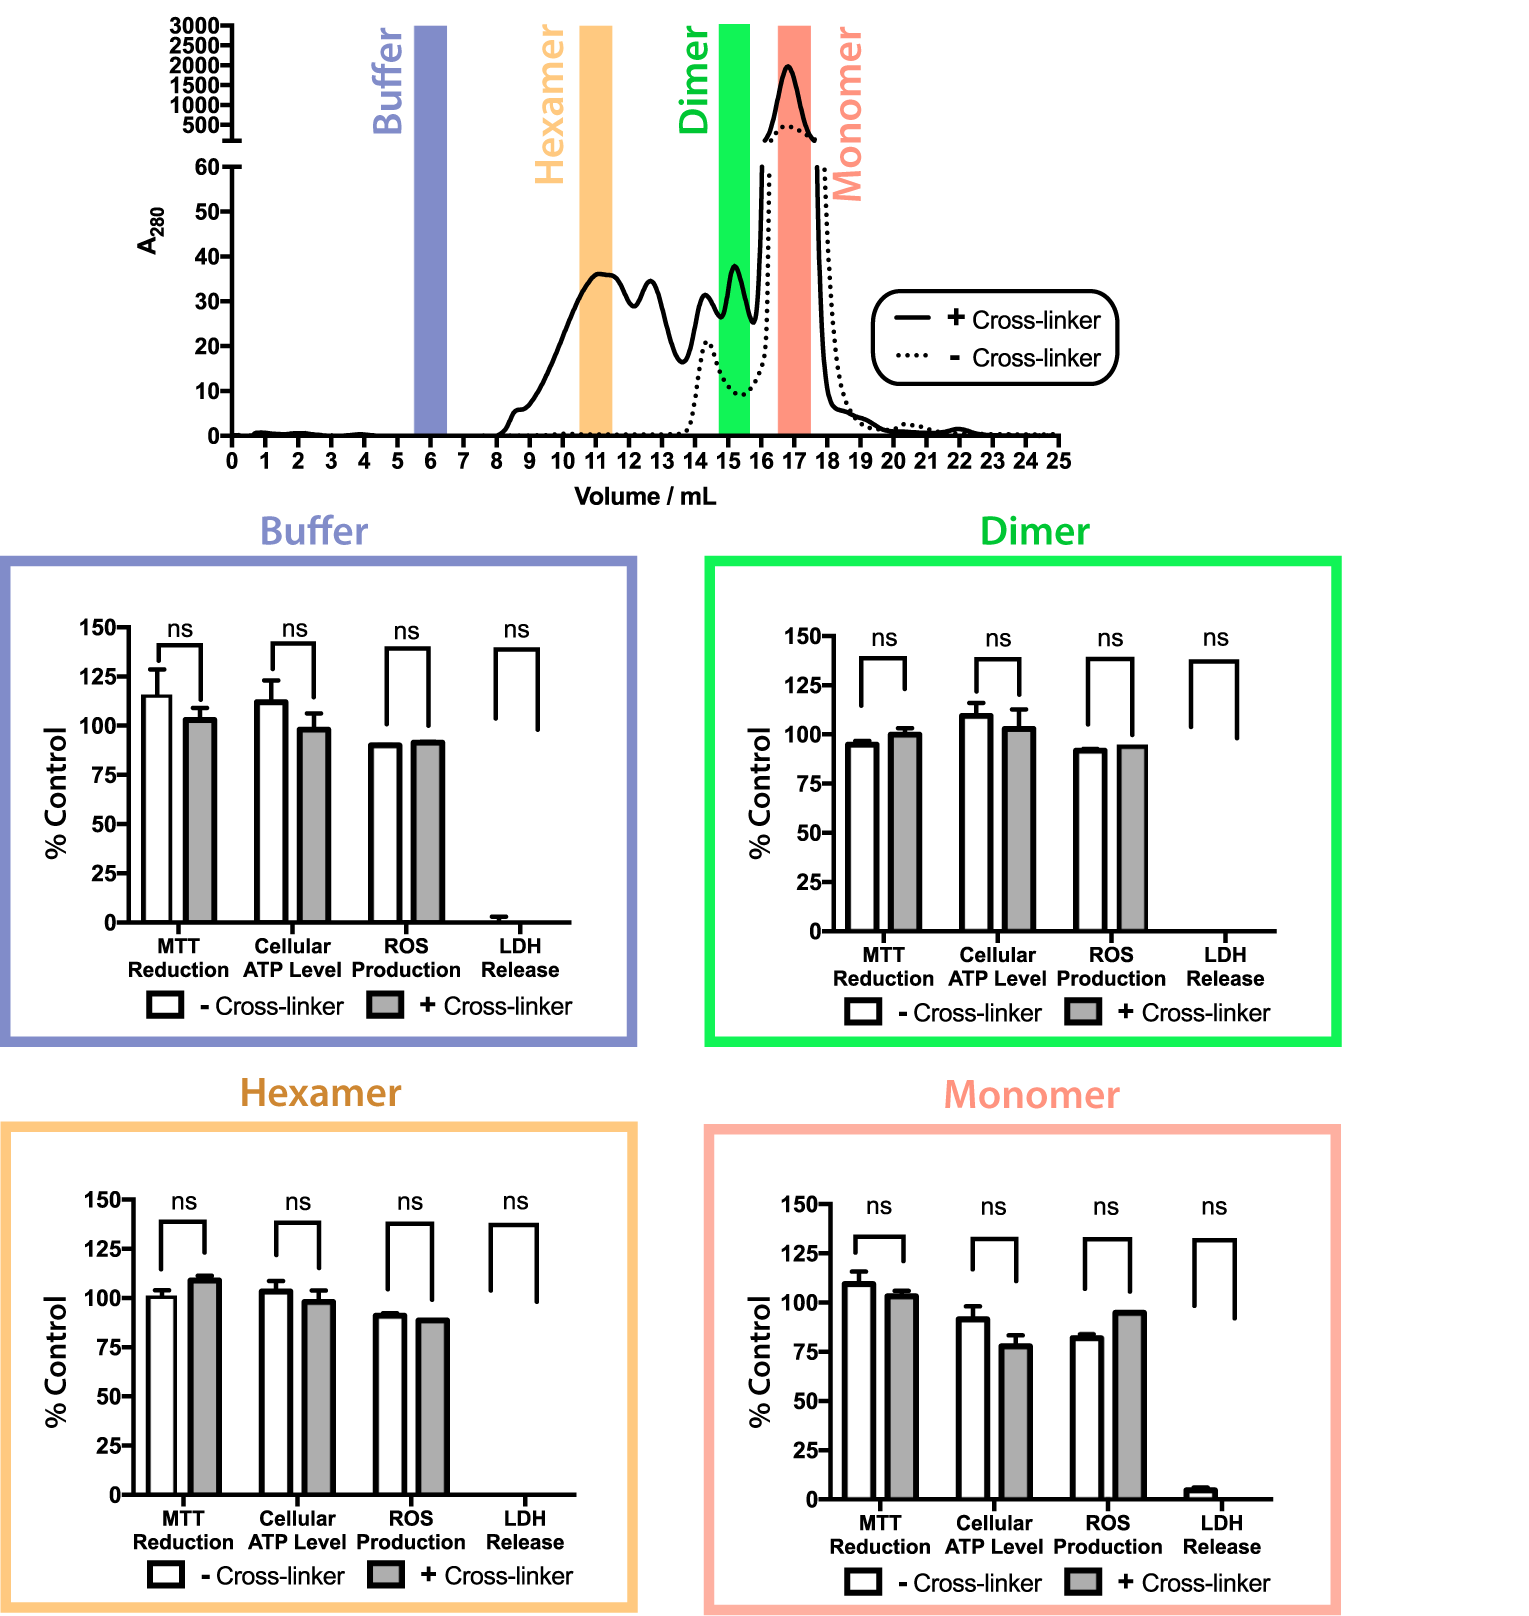

Supplement: supp [file elife-46574-supp-v1.zip › elife_poa_e46574_Figure_5_figure_supplement_6.tif]

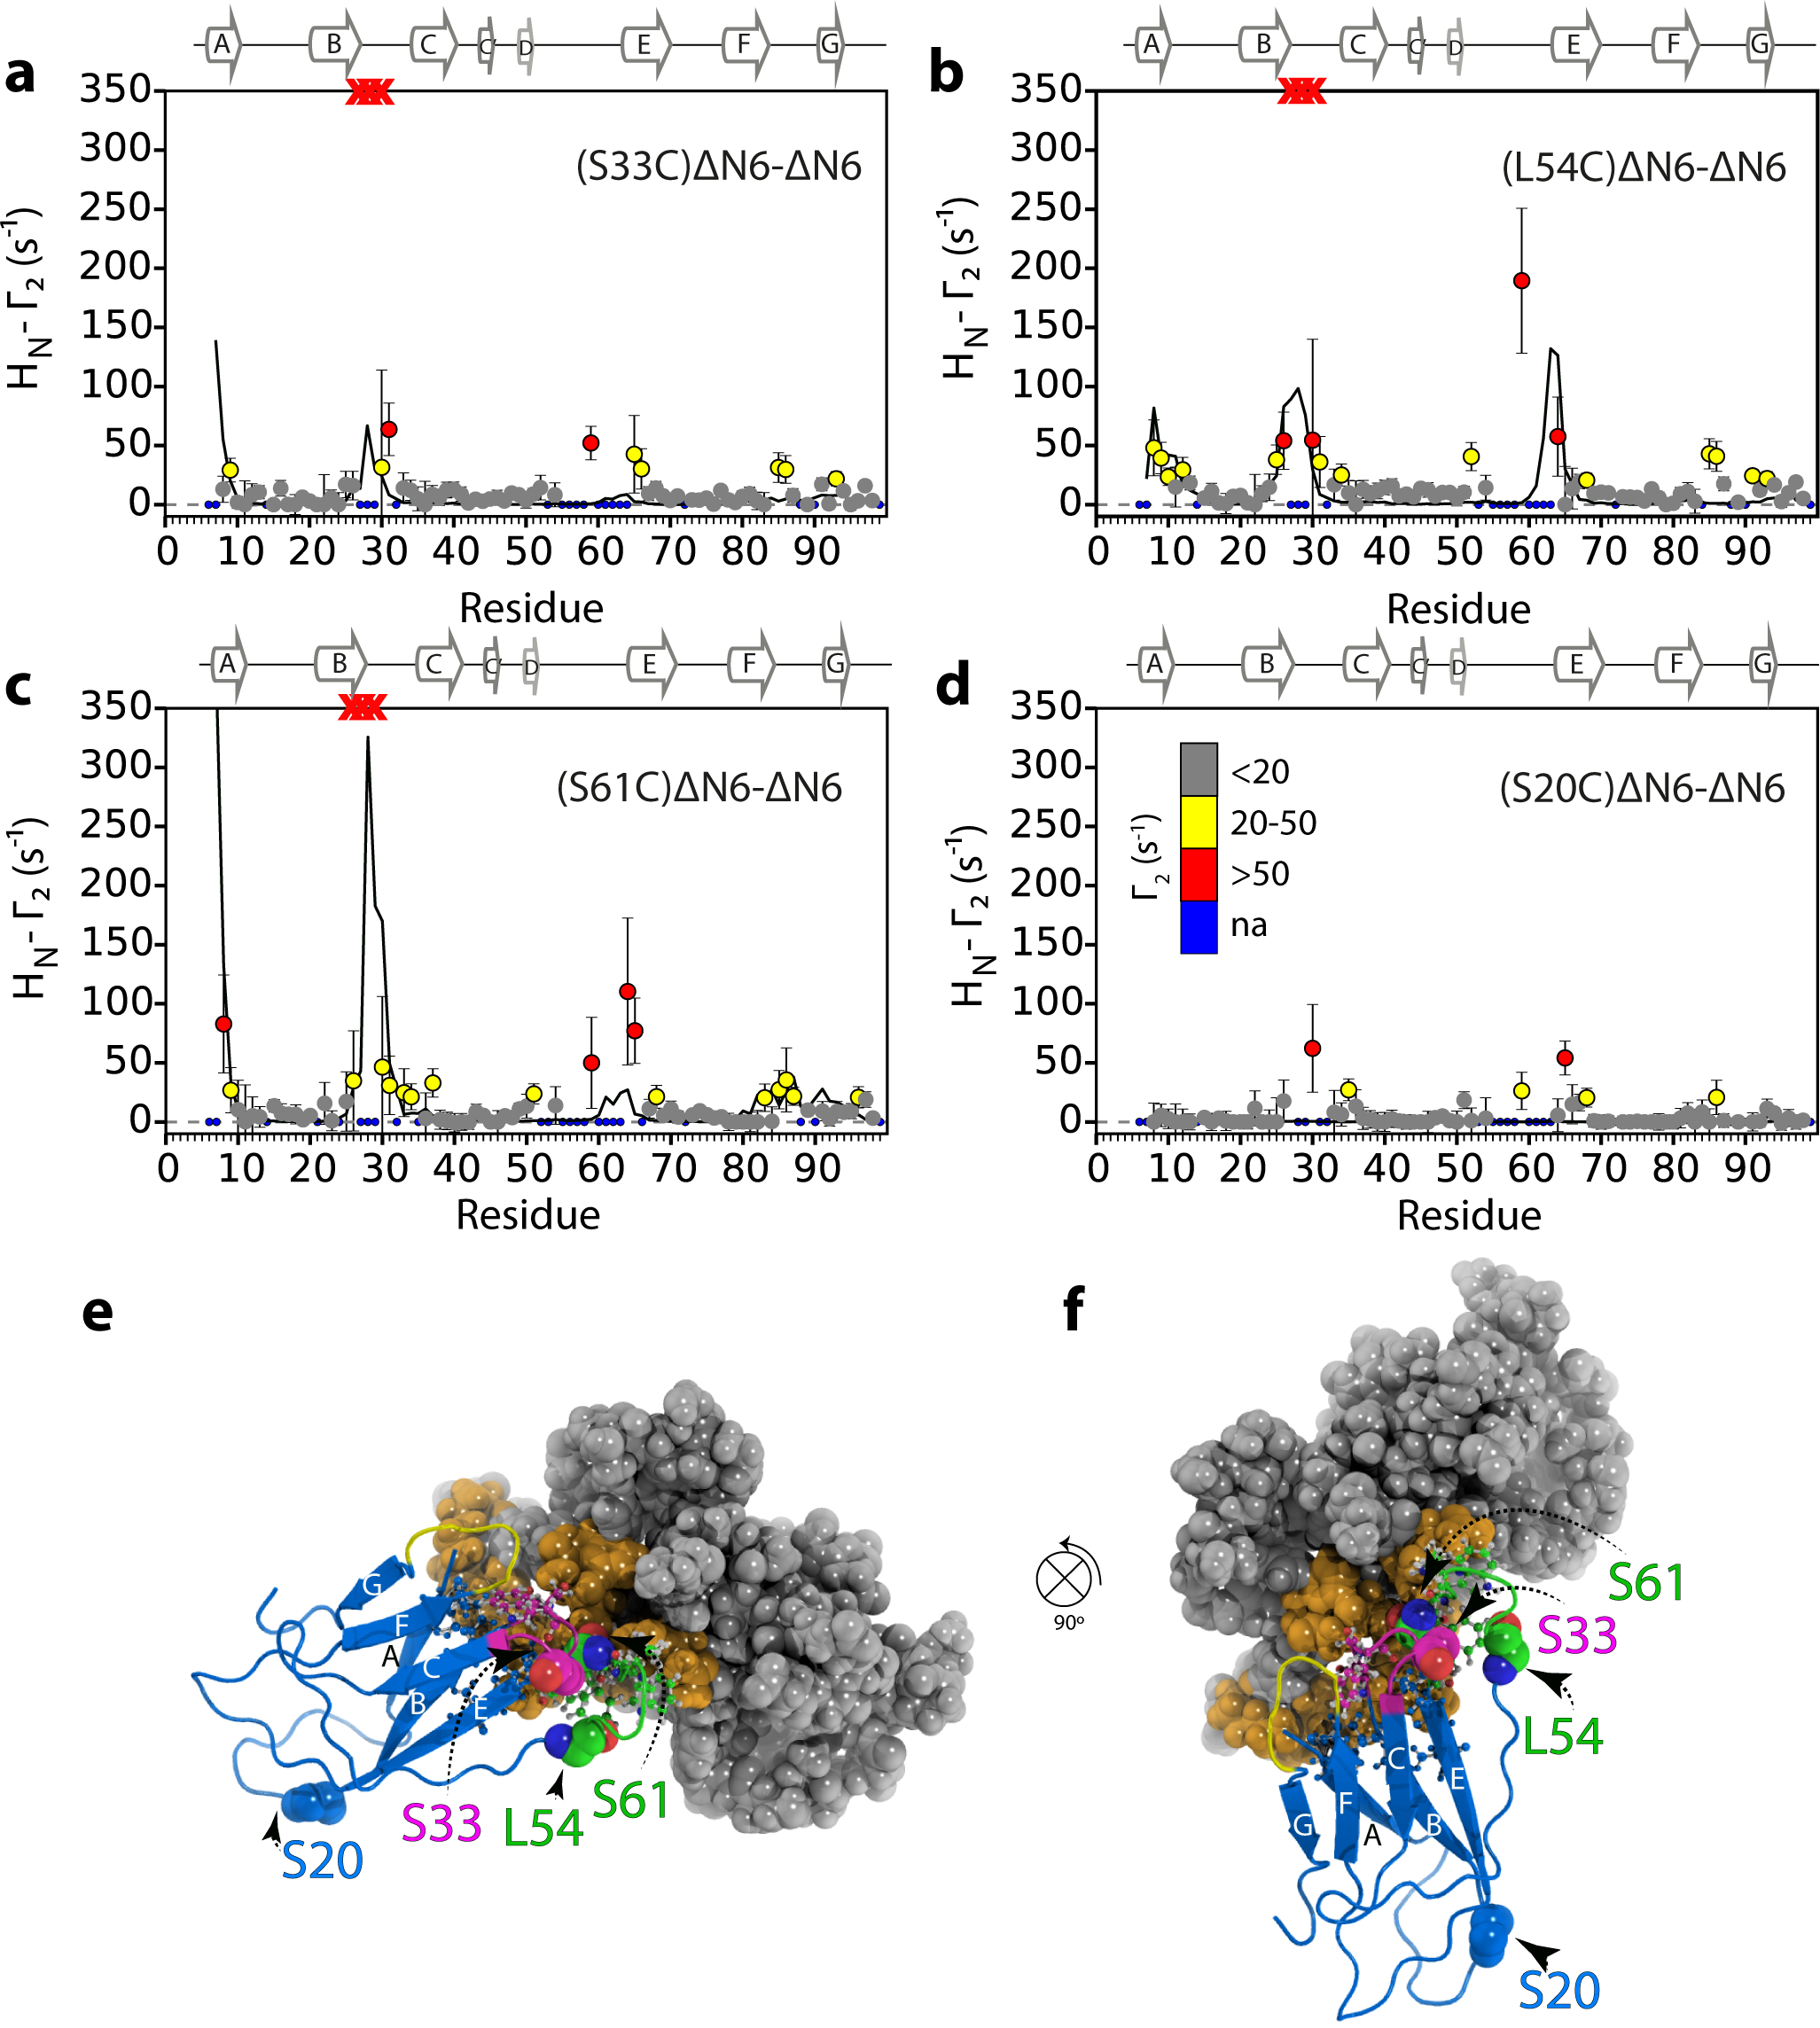

Supplement: supp [file elife-46574-supp-v1.zip › elife_poa_e46574_Figure_4_figure_supplement_1.tif]

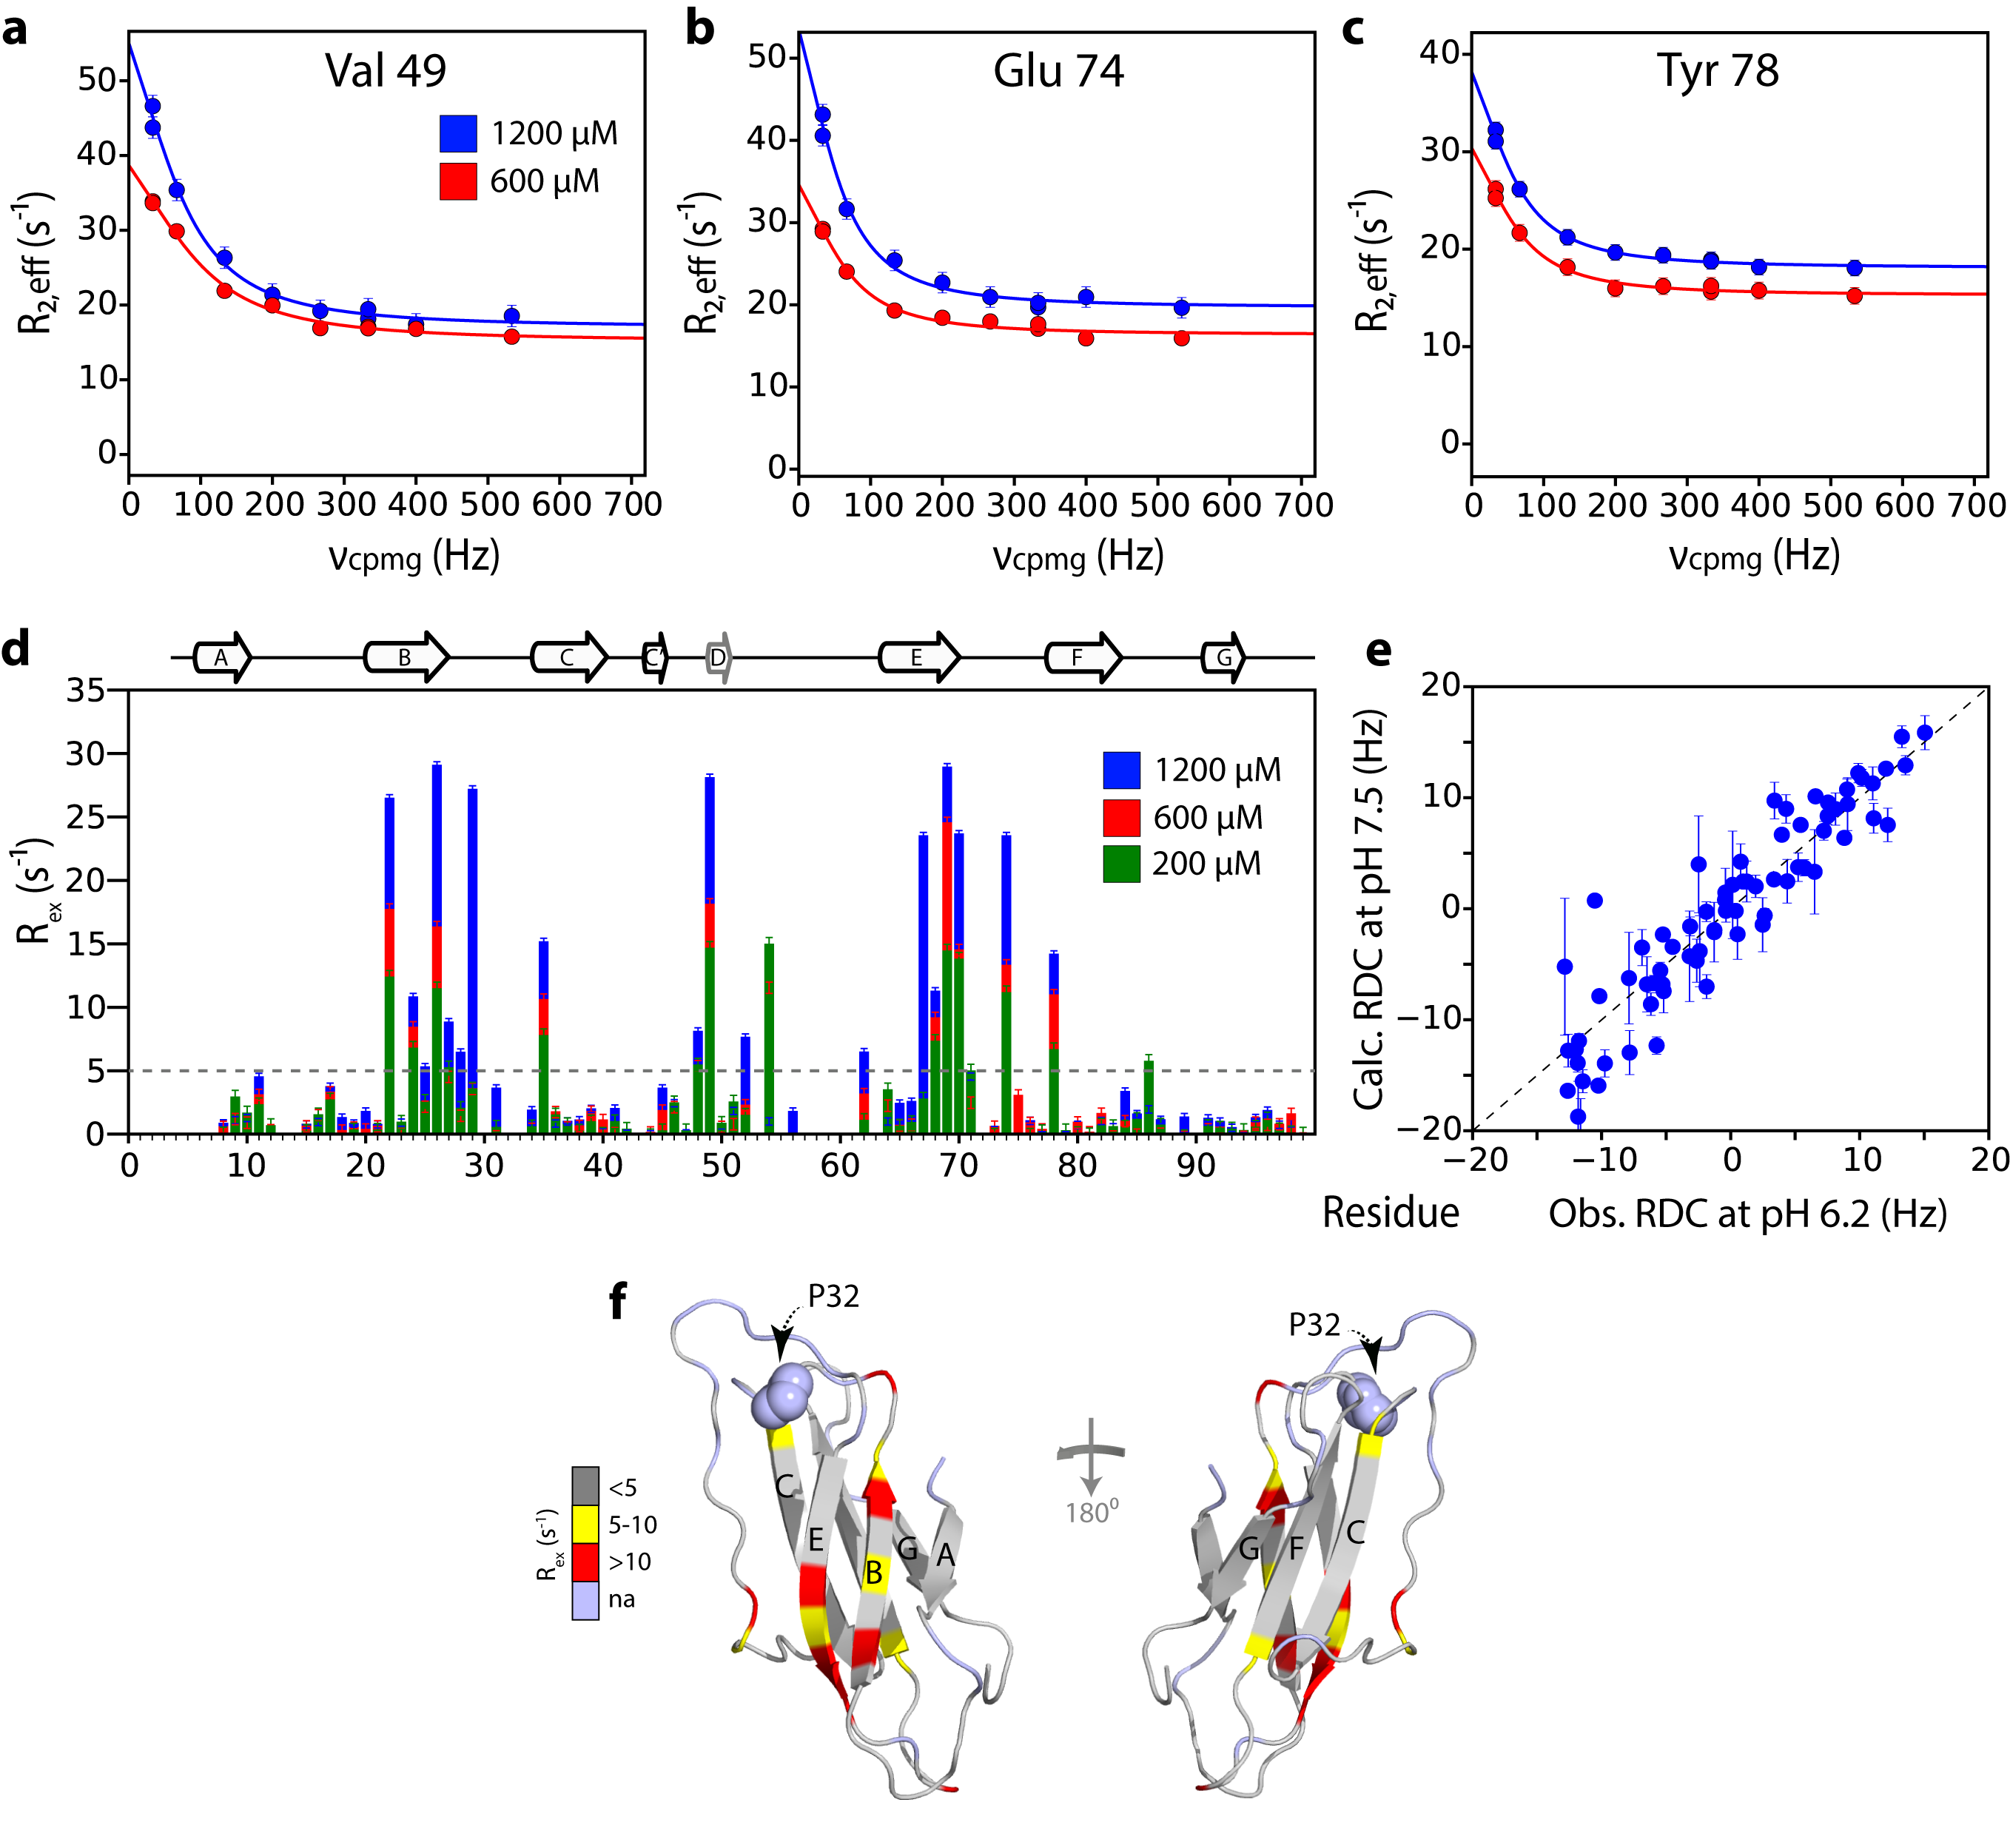

Supplement: supp [file elife-46574-supp-v1.zip › elife_poa_e46574_Figure_3_figure_supplement_2.tif]

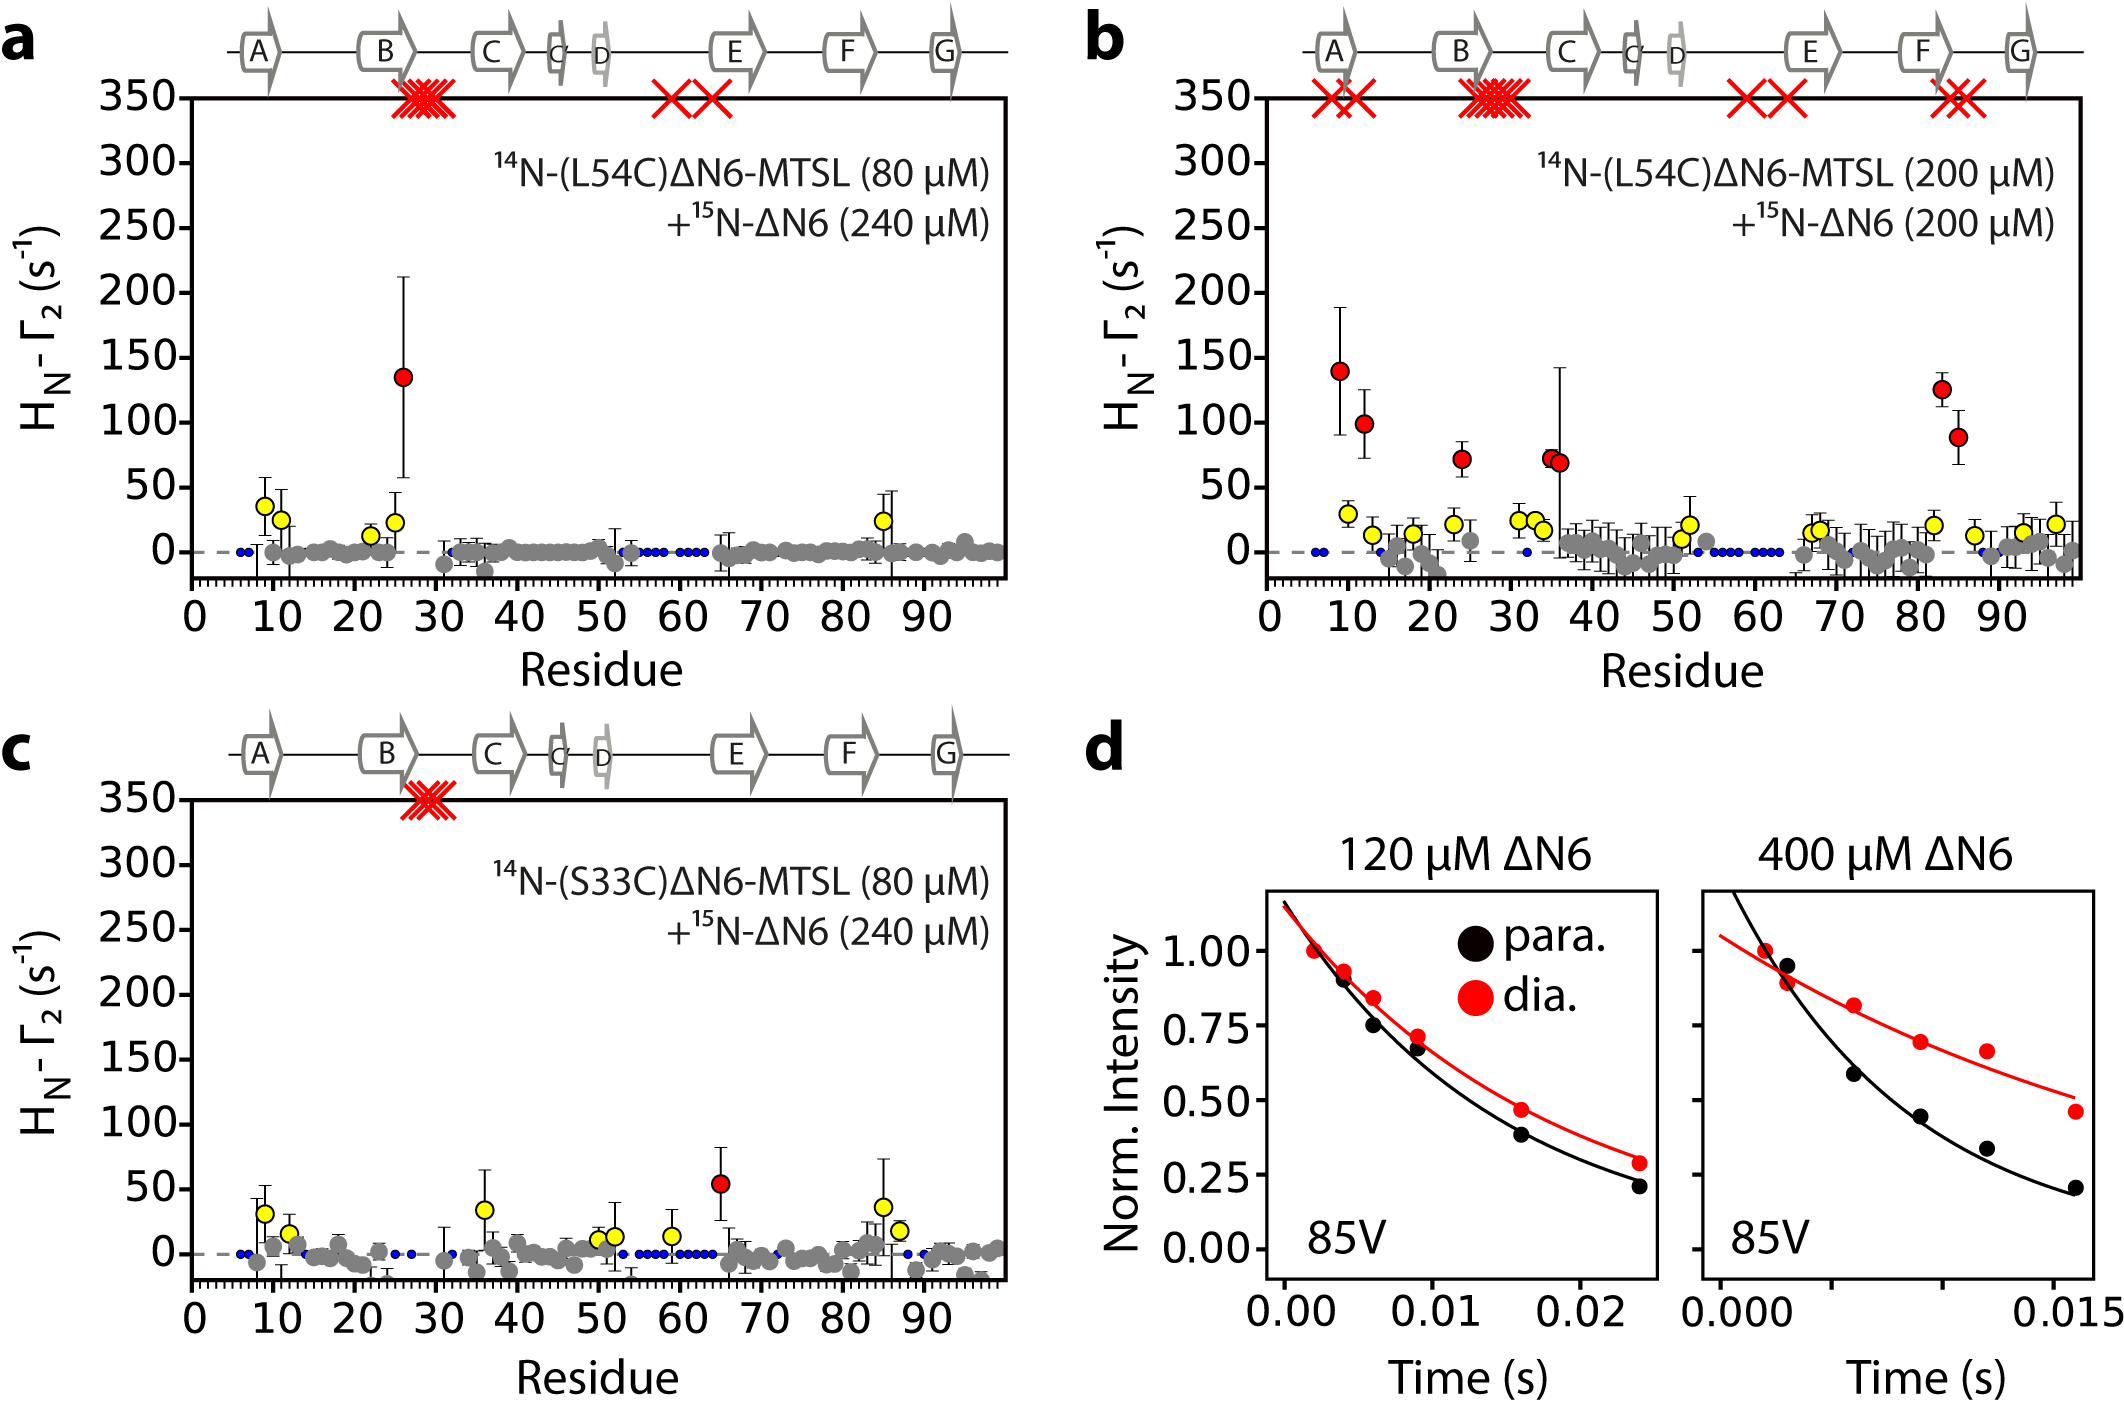

Supplement: supp [file elife-46574-supp-v1.zip › elife_poa_e46574_Figure_5_figure_supplement_1.tif]

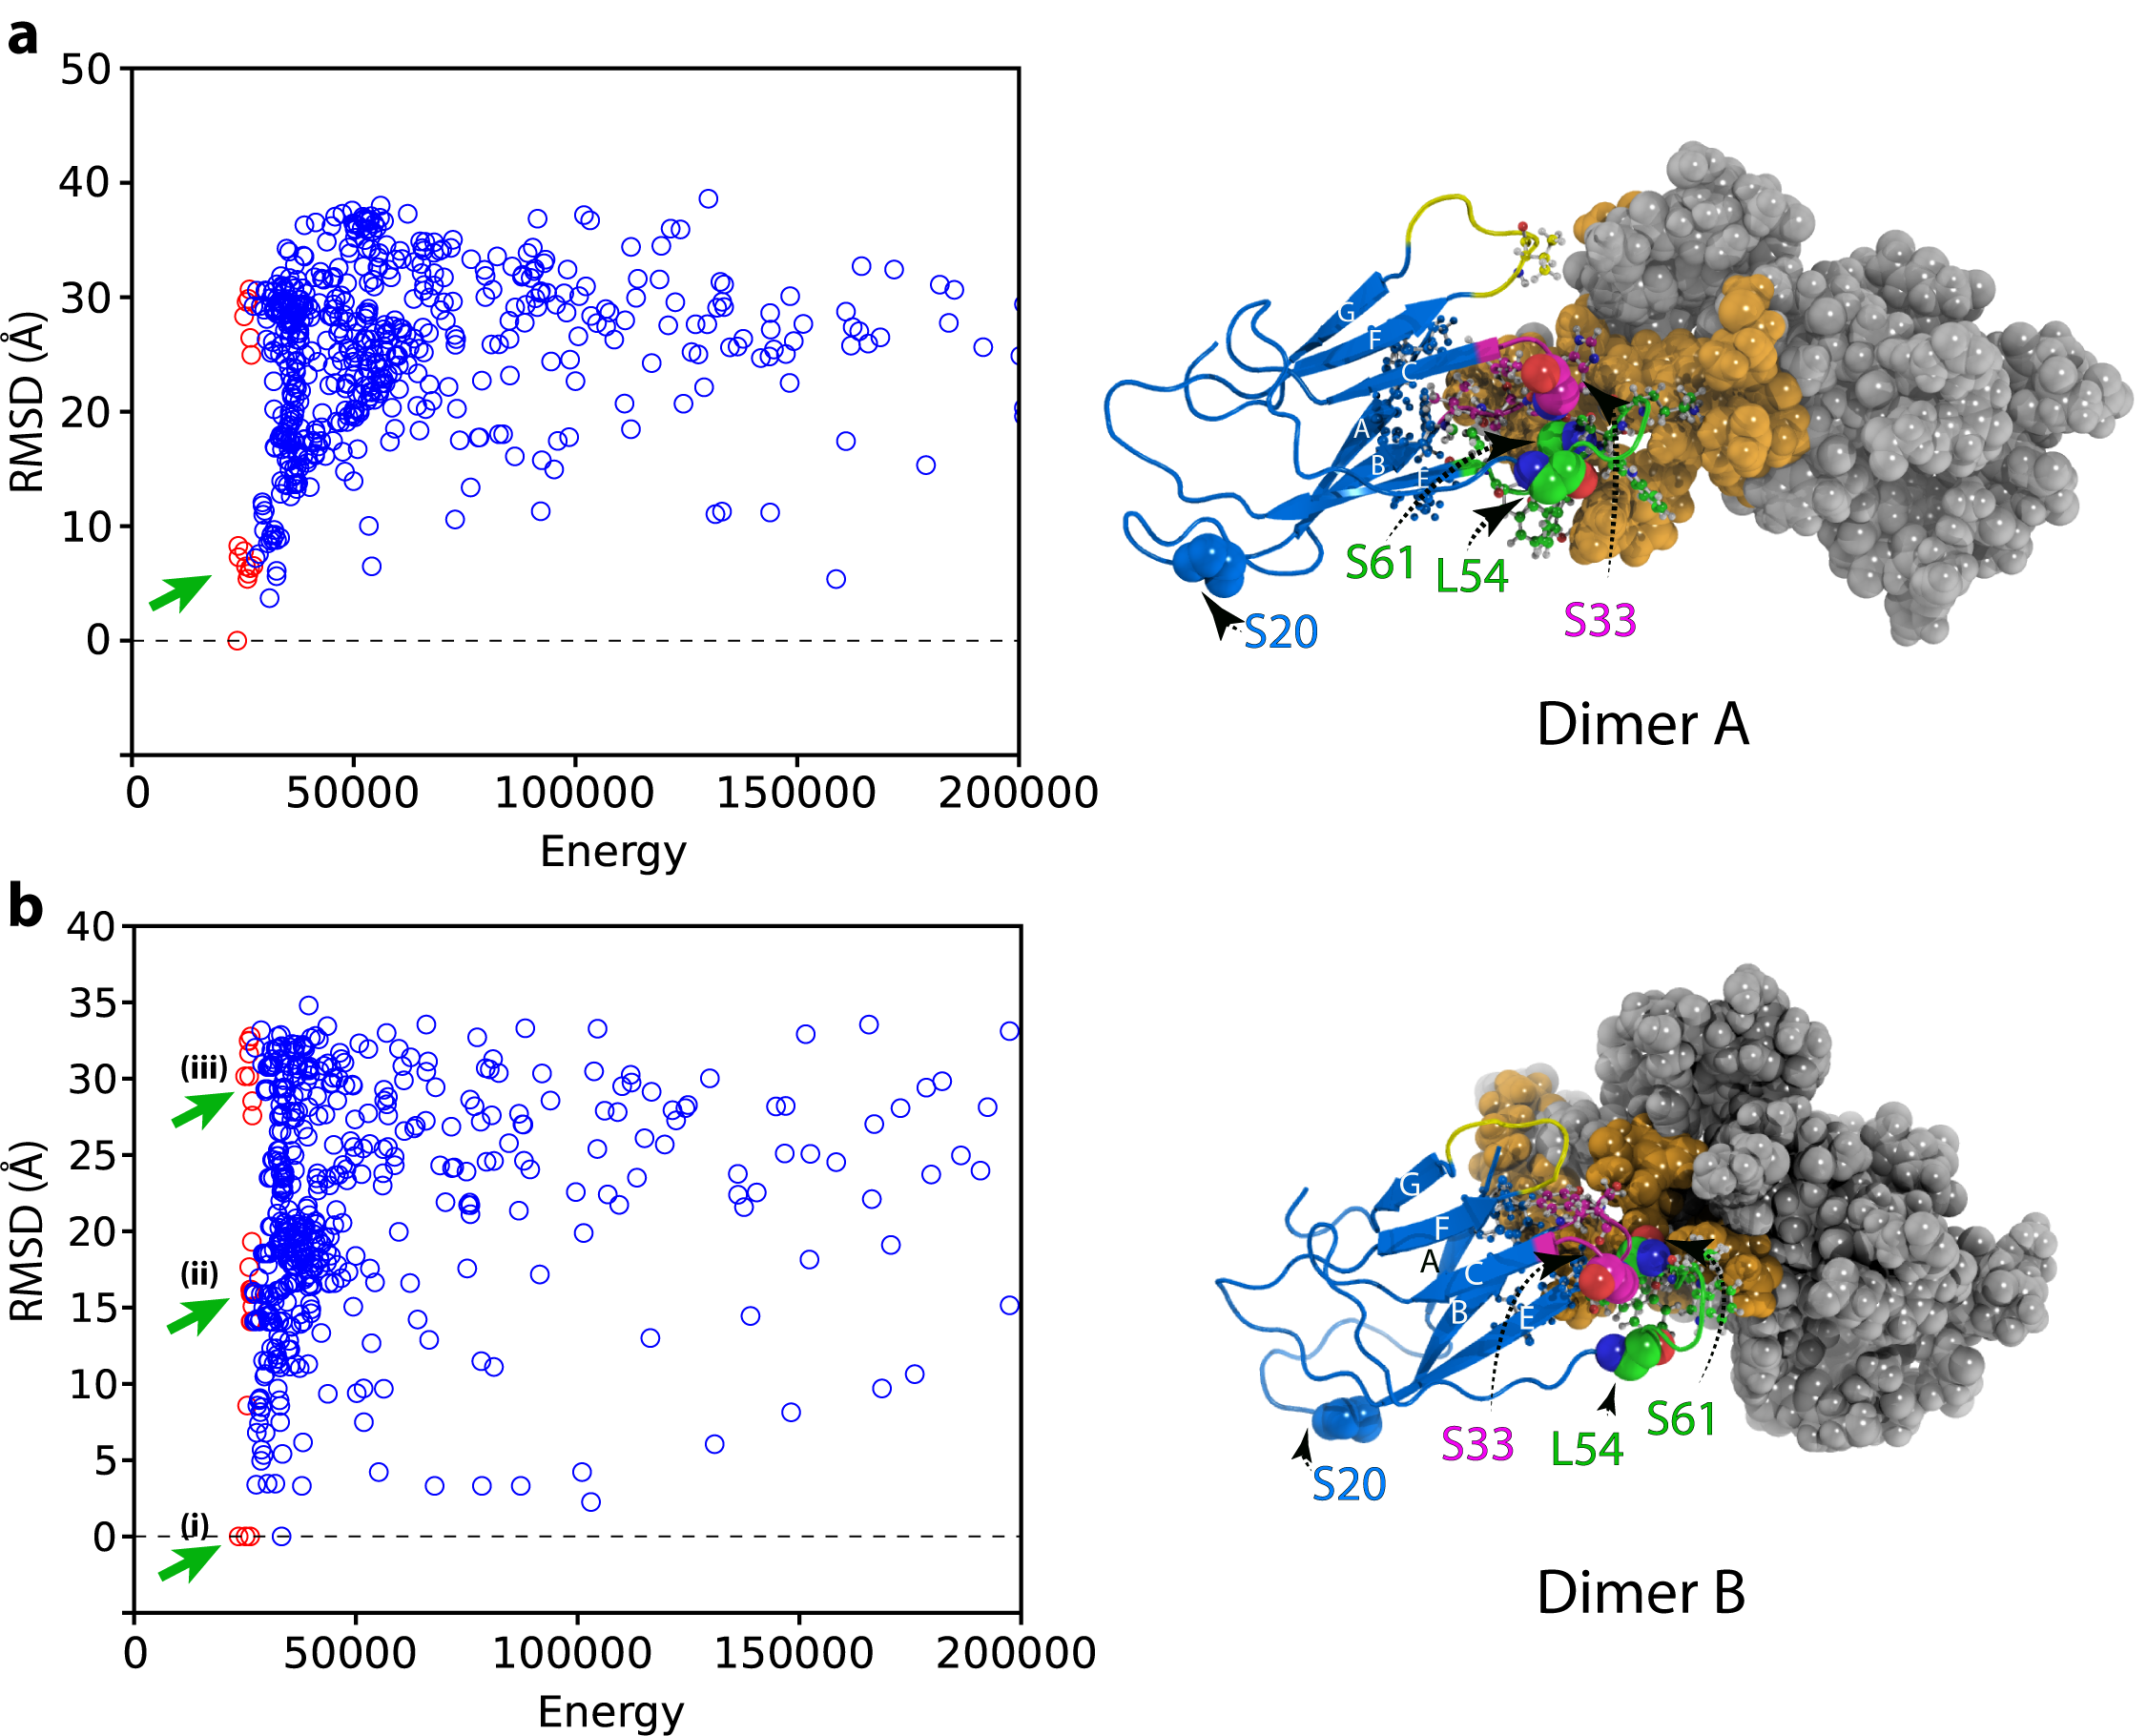

Supplement: supp [file elife-46574-supp-v1.zip › elife_poa_e46574_Figure_5_figure_supplement_3.tif]

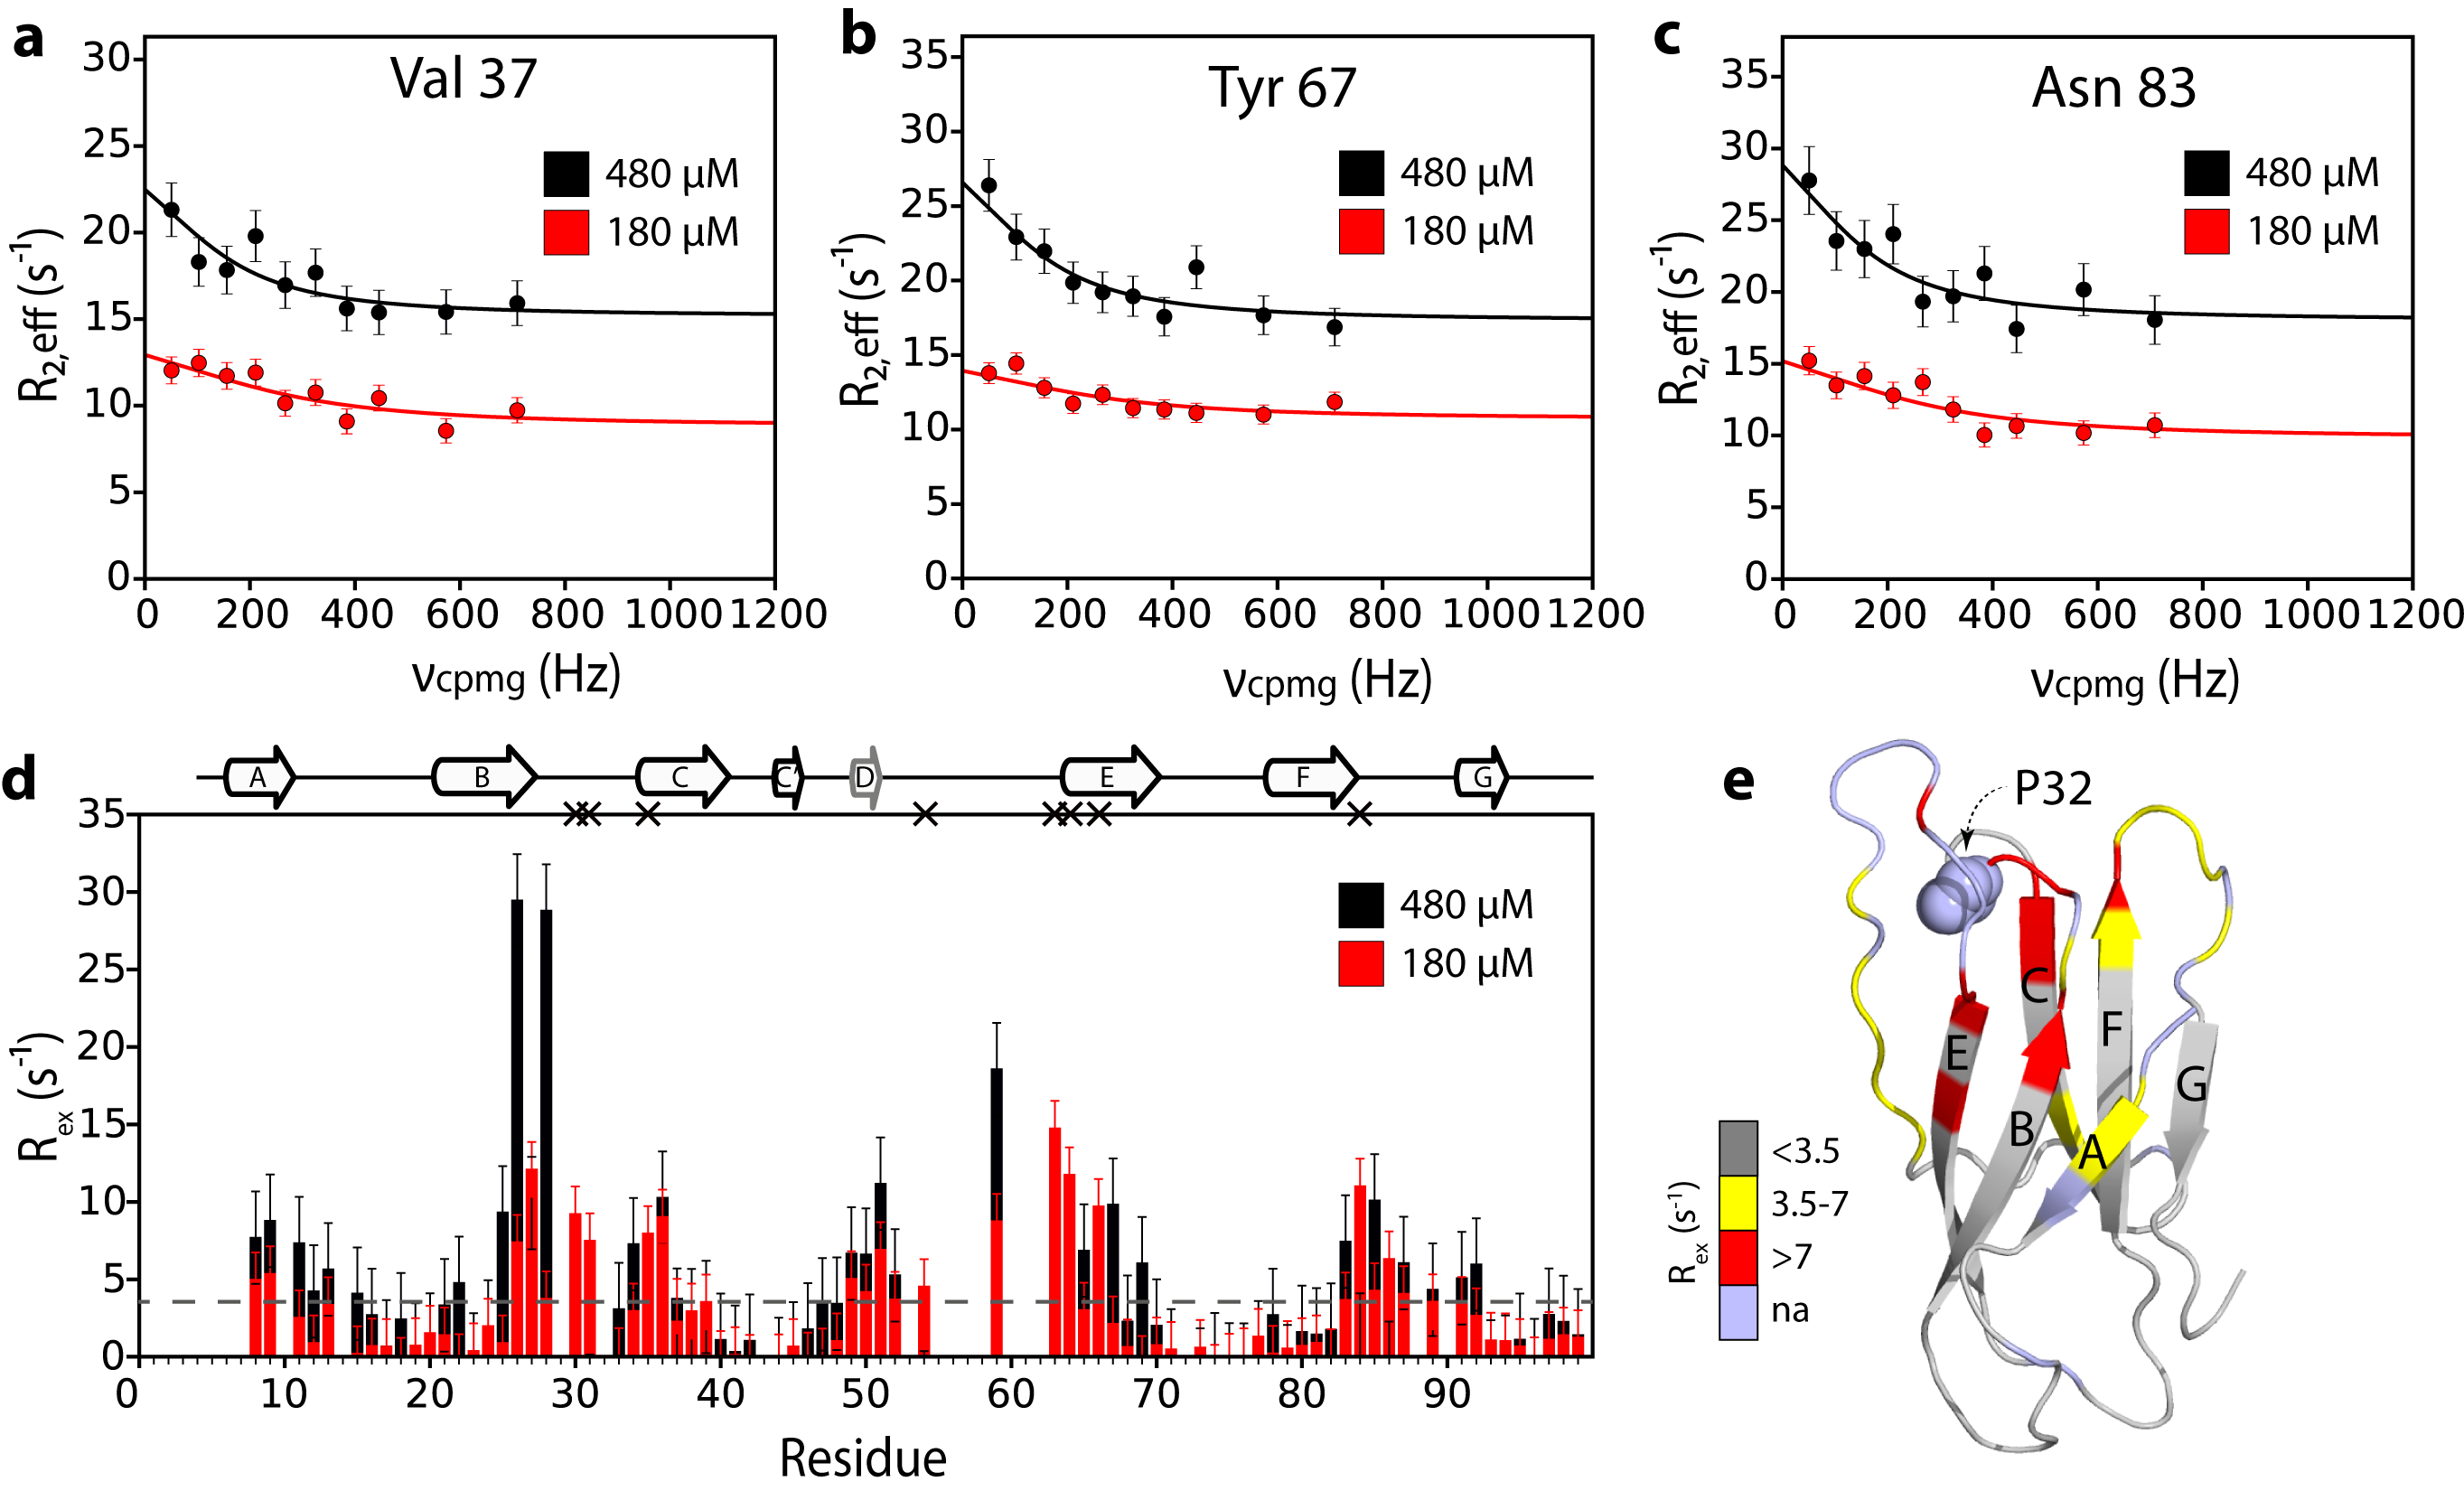

Supplement: supp [file elife-46574-supp-v1.zip › elife_poa_e46574_Figure_5_figure_supplement_2.tif]

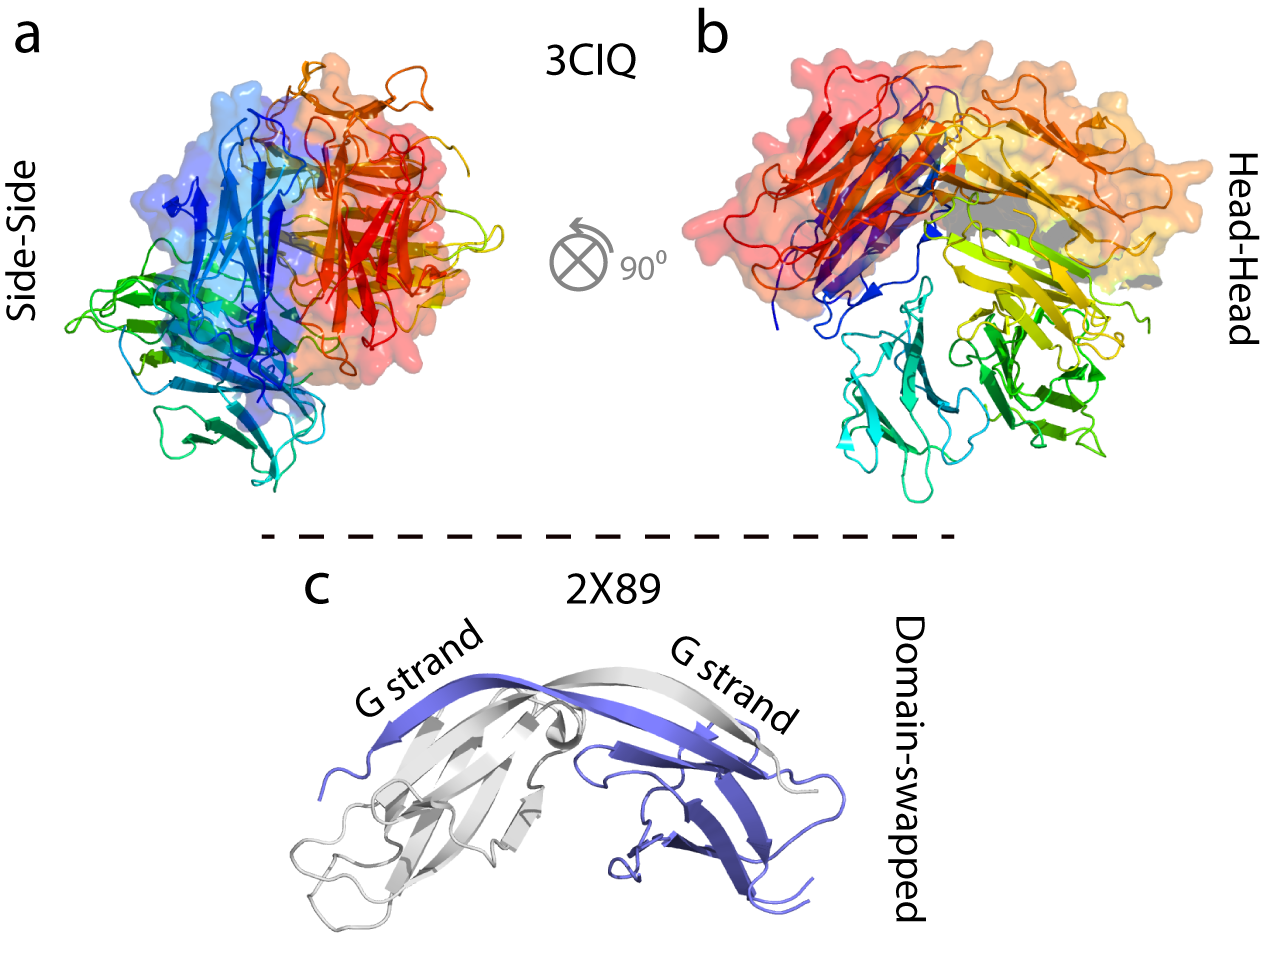

Supplement: supp [file elife-46574-supp-v1.zip › elife_poa_e46574_Figure_8_figure_supplement_2.tif]

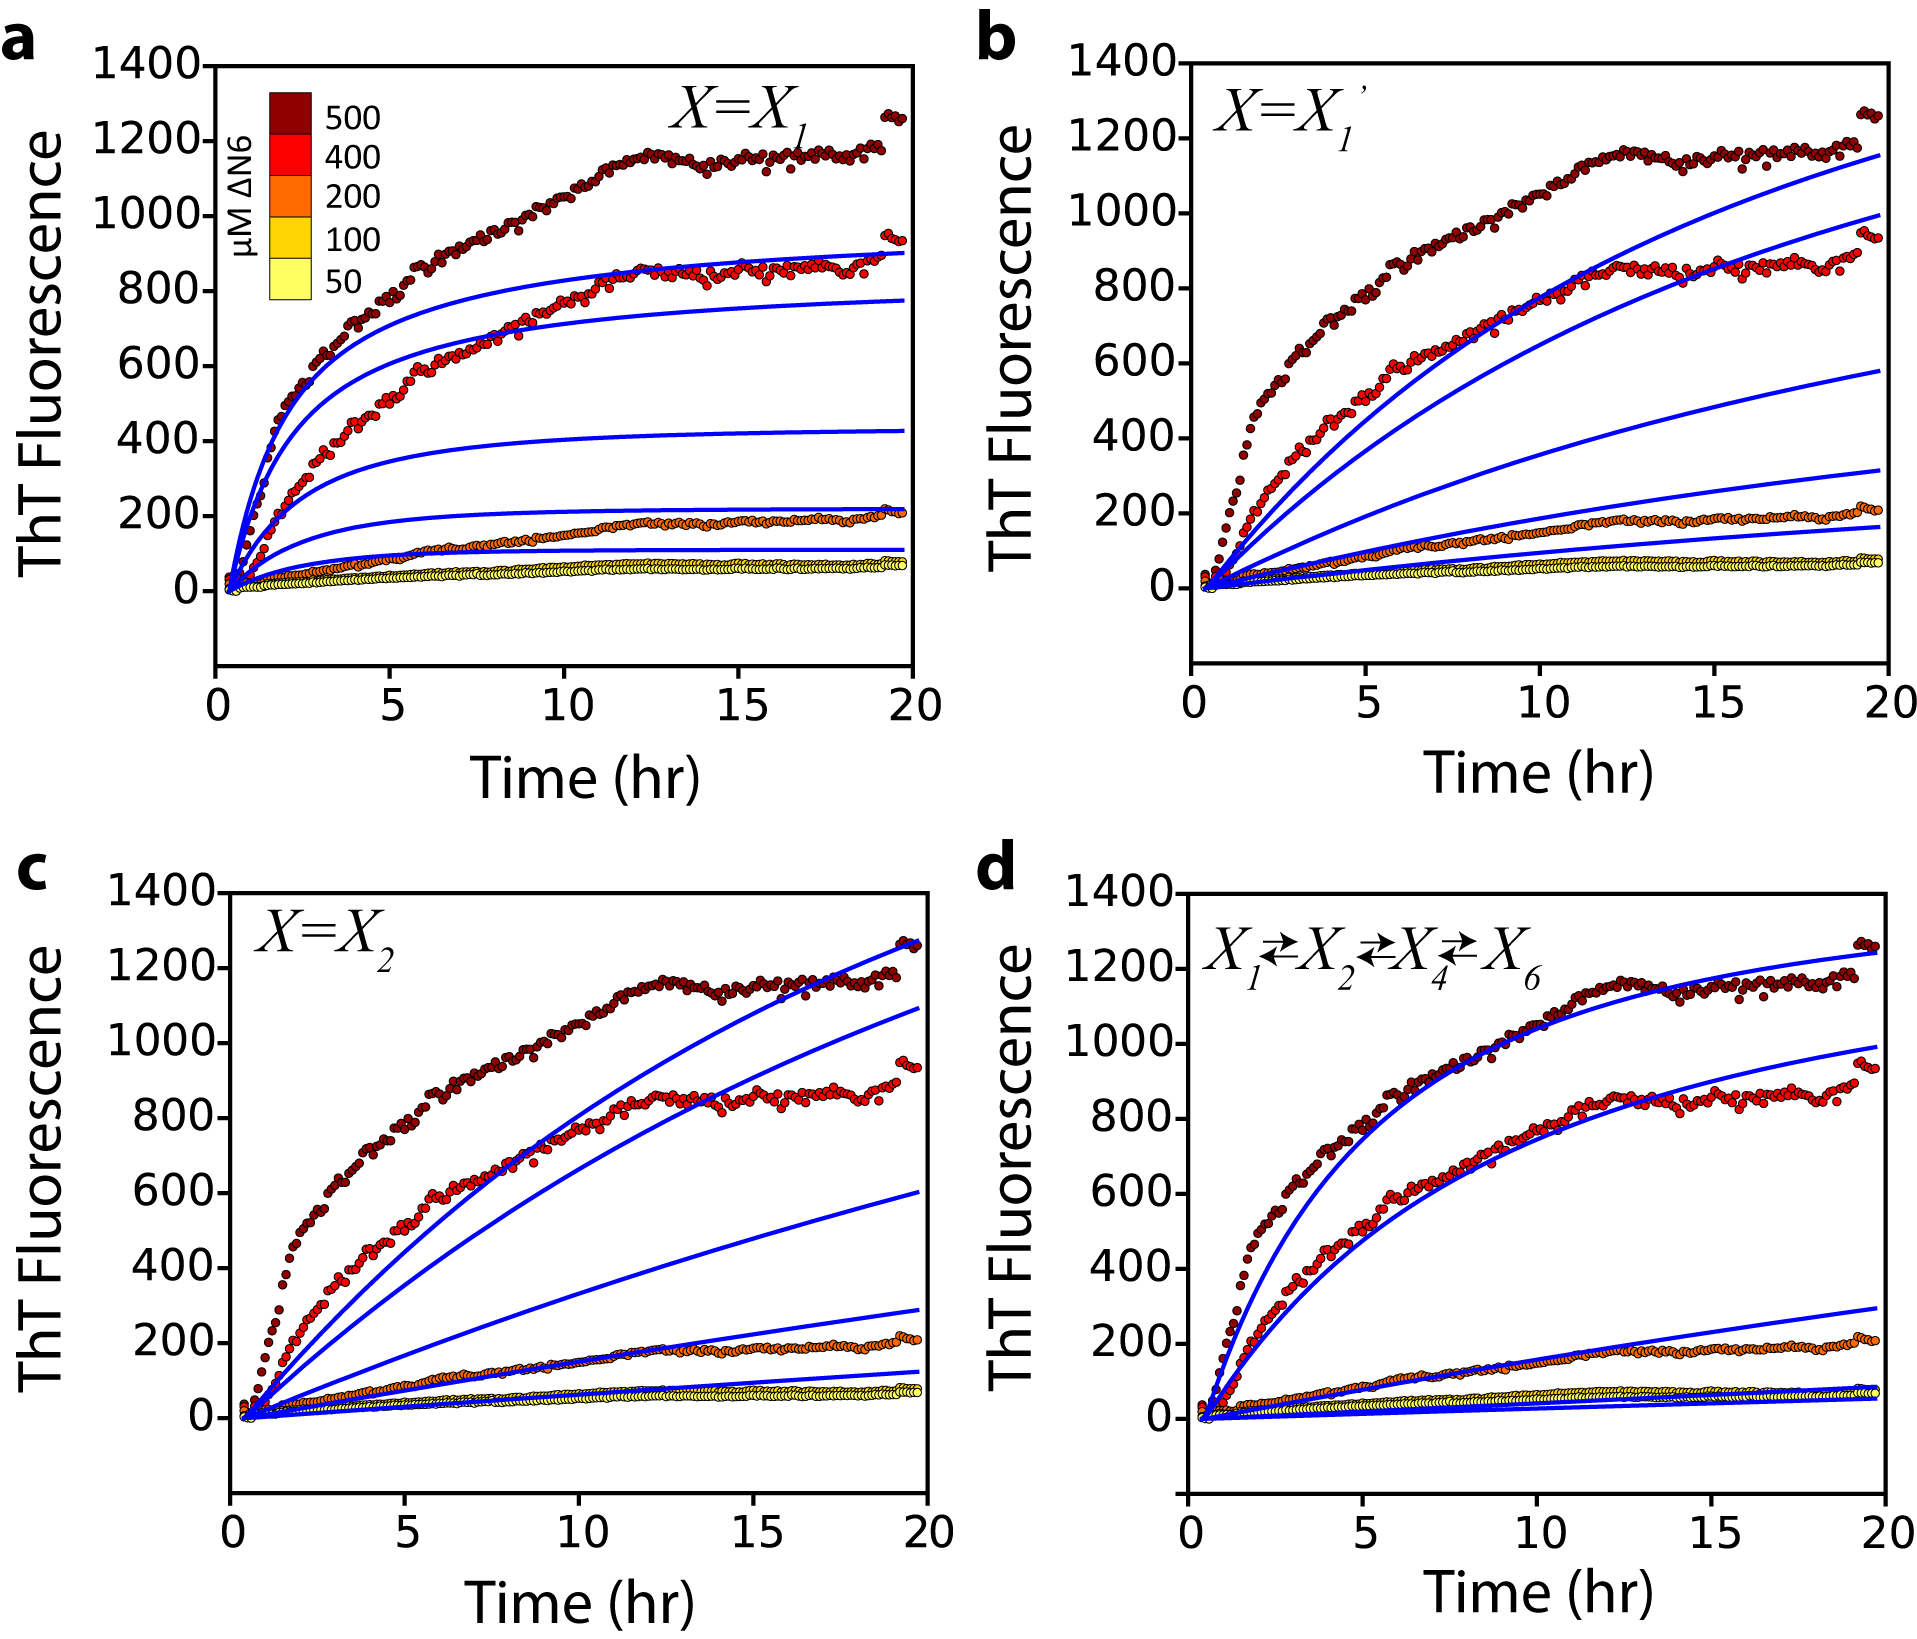

Supplement: supp [file elife-46574-supp-v1.zip › elife_poa_e46574_Figure_7_figure_supplement_1.tif]

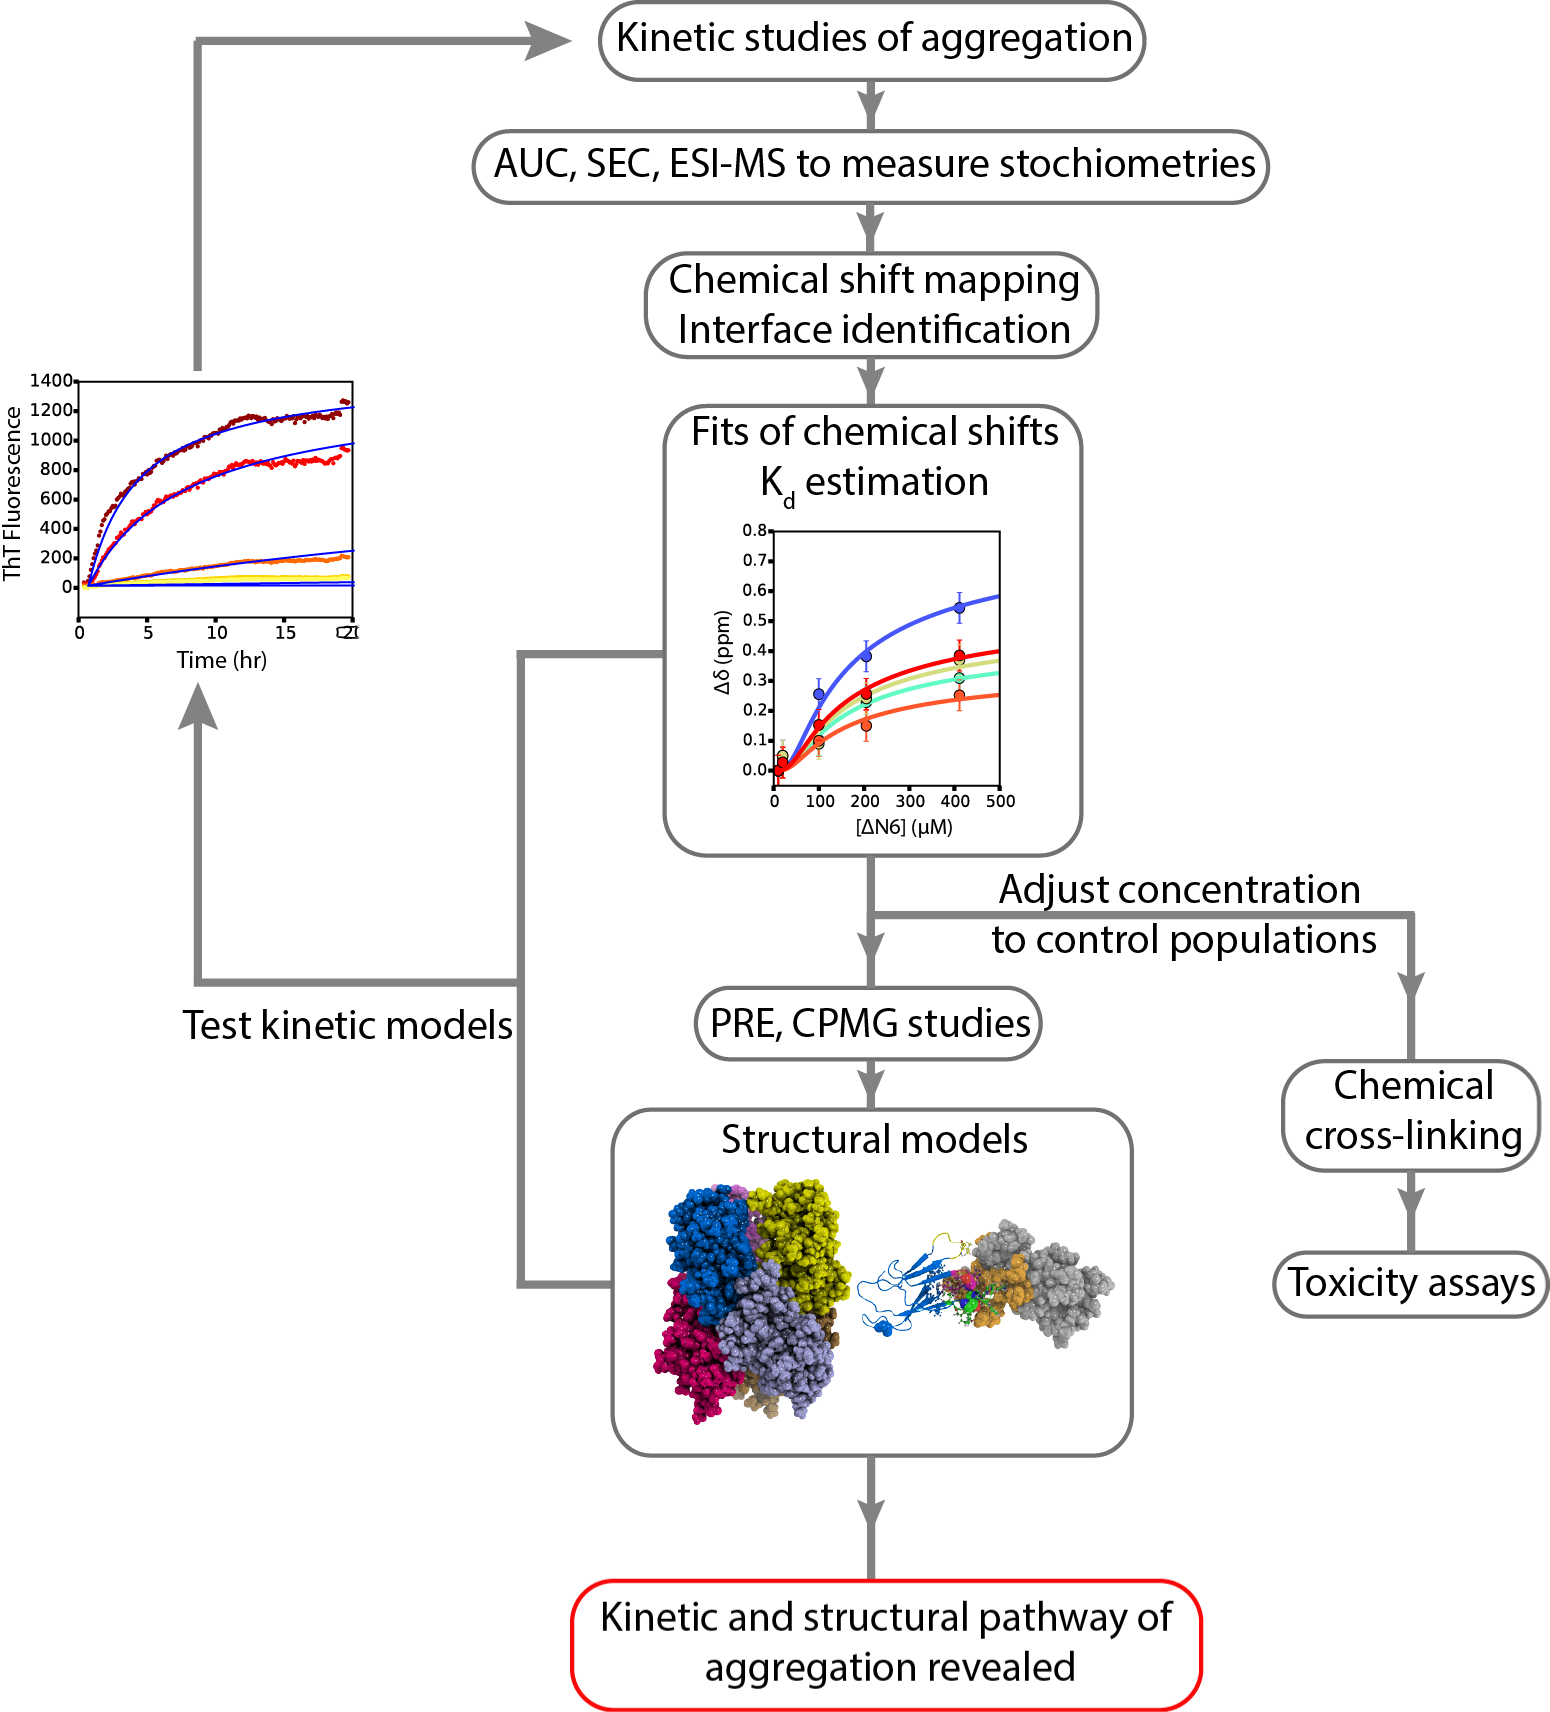

Supplement: supp [file elife-46574-supp-v1.zip › elife_poa_e46574_Figure_8_figure_supplement_1.tif]

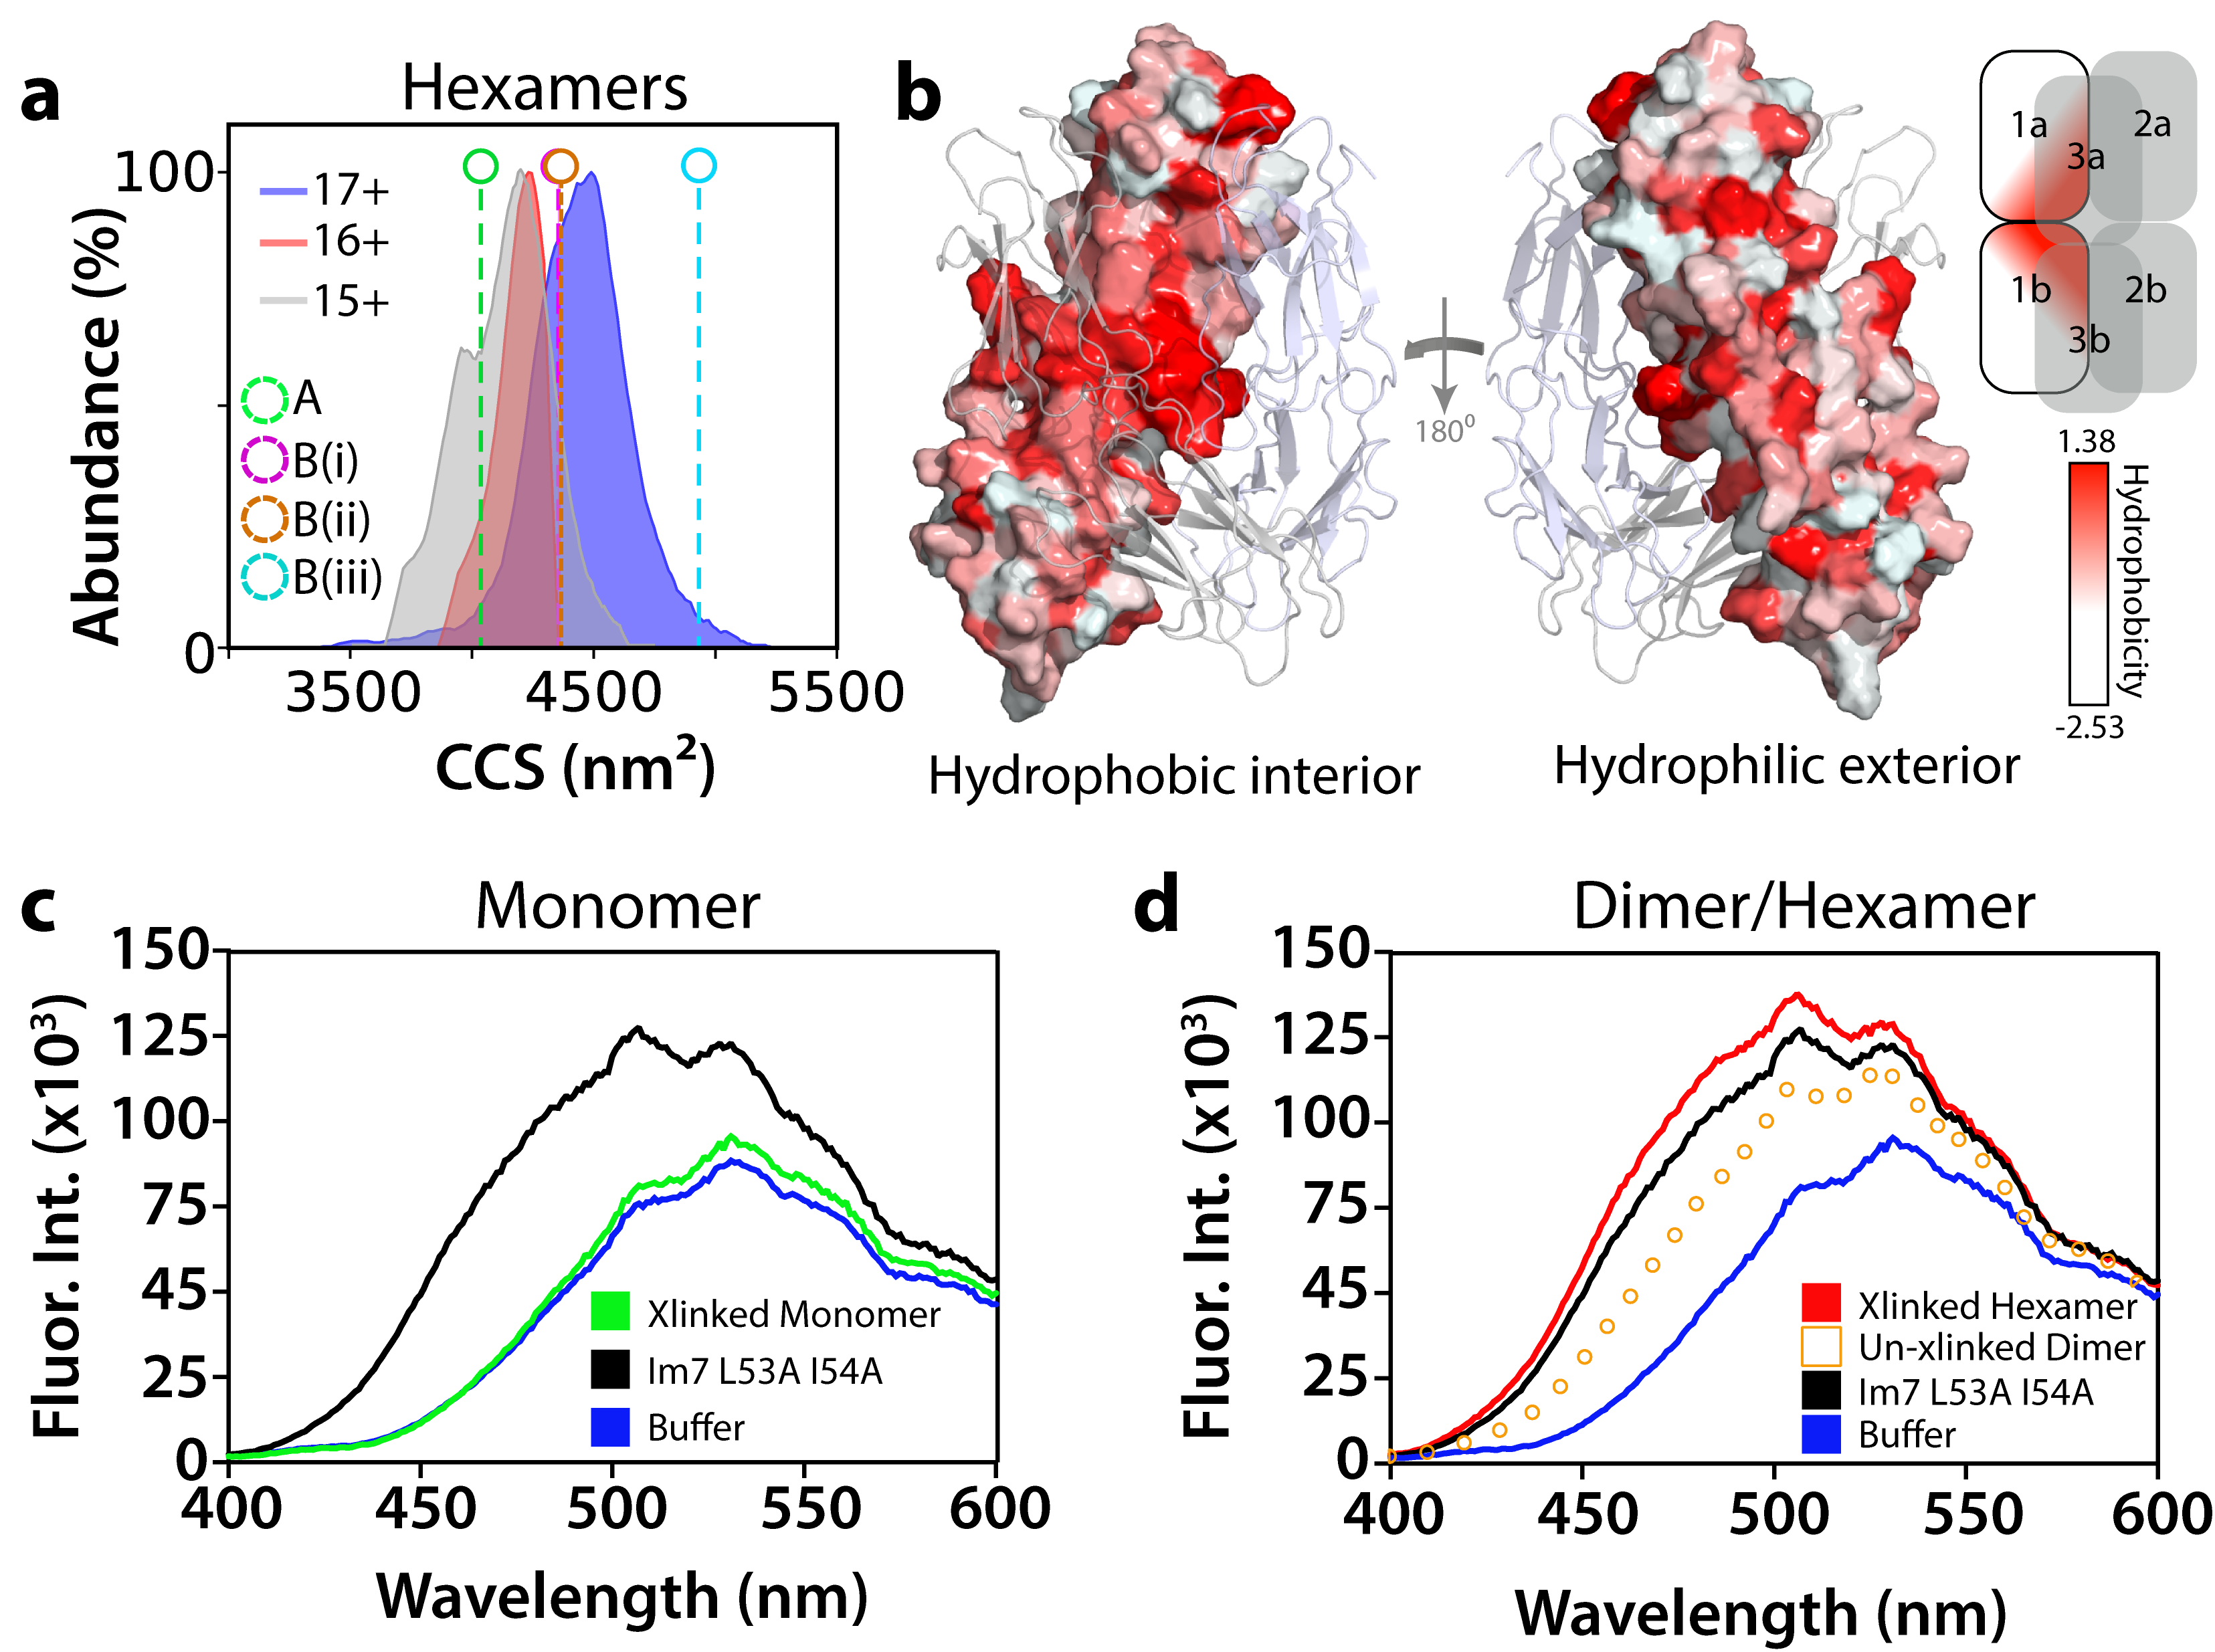

Supplement: supp [file elife-46574-supp-v1.zip › elife_poa_e46574_Figure_5_figure_supplement_5.tif]

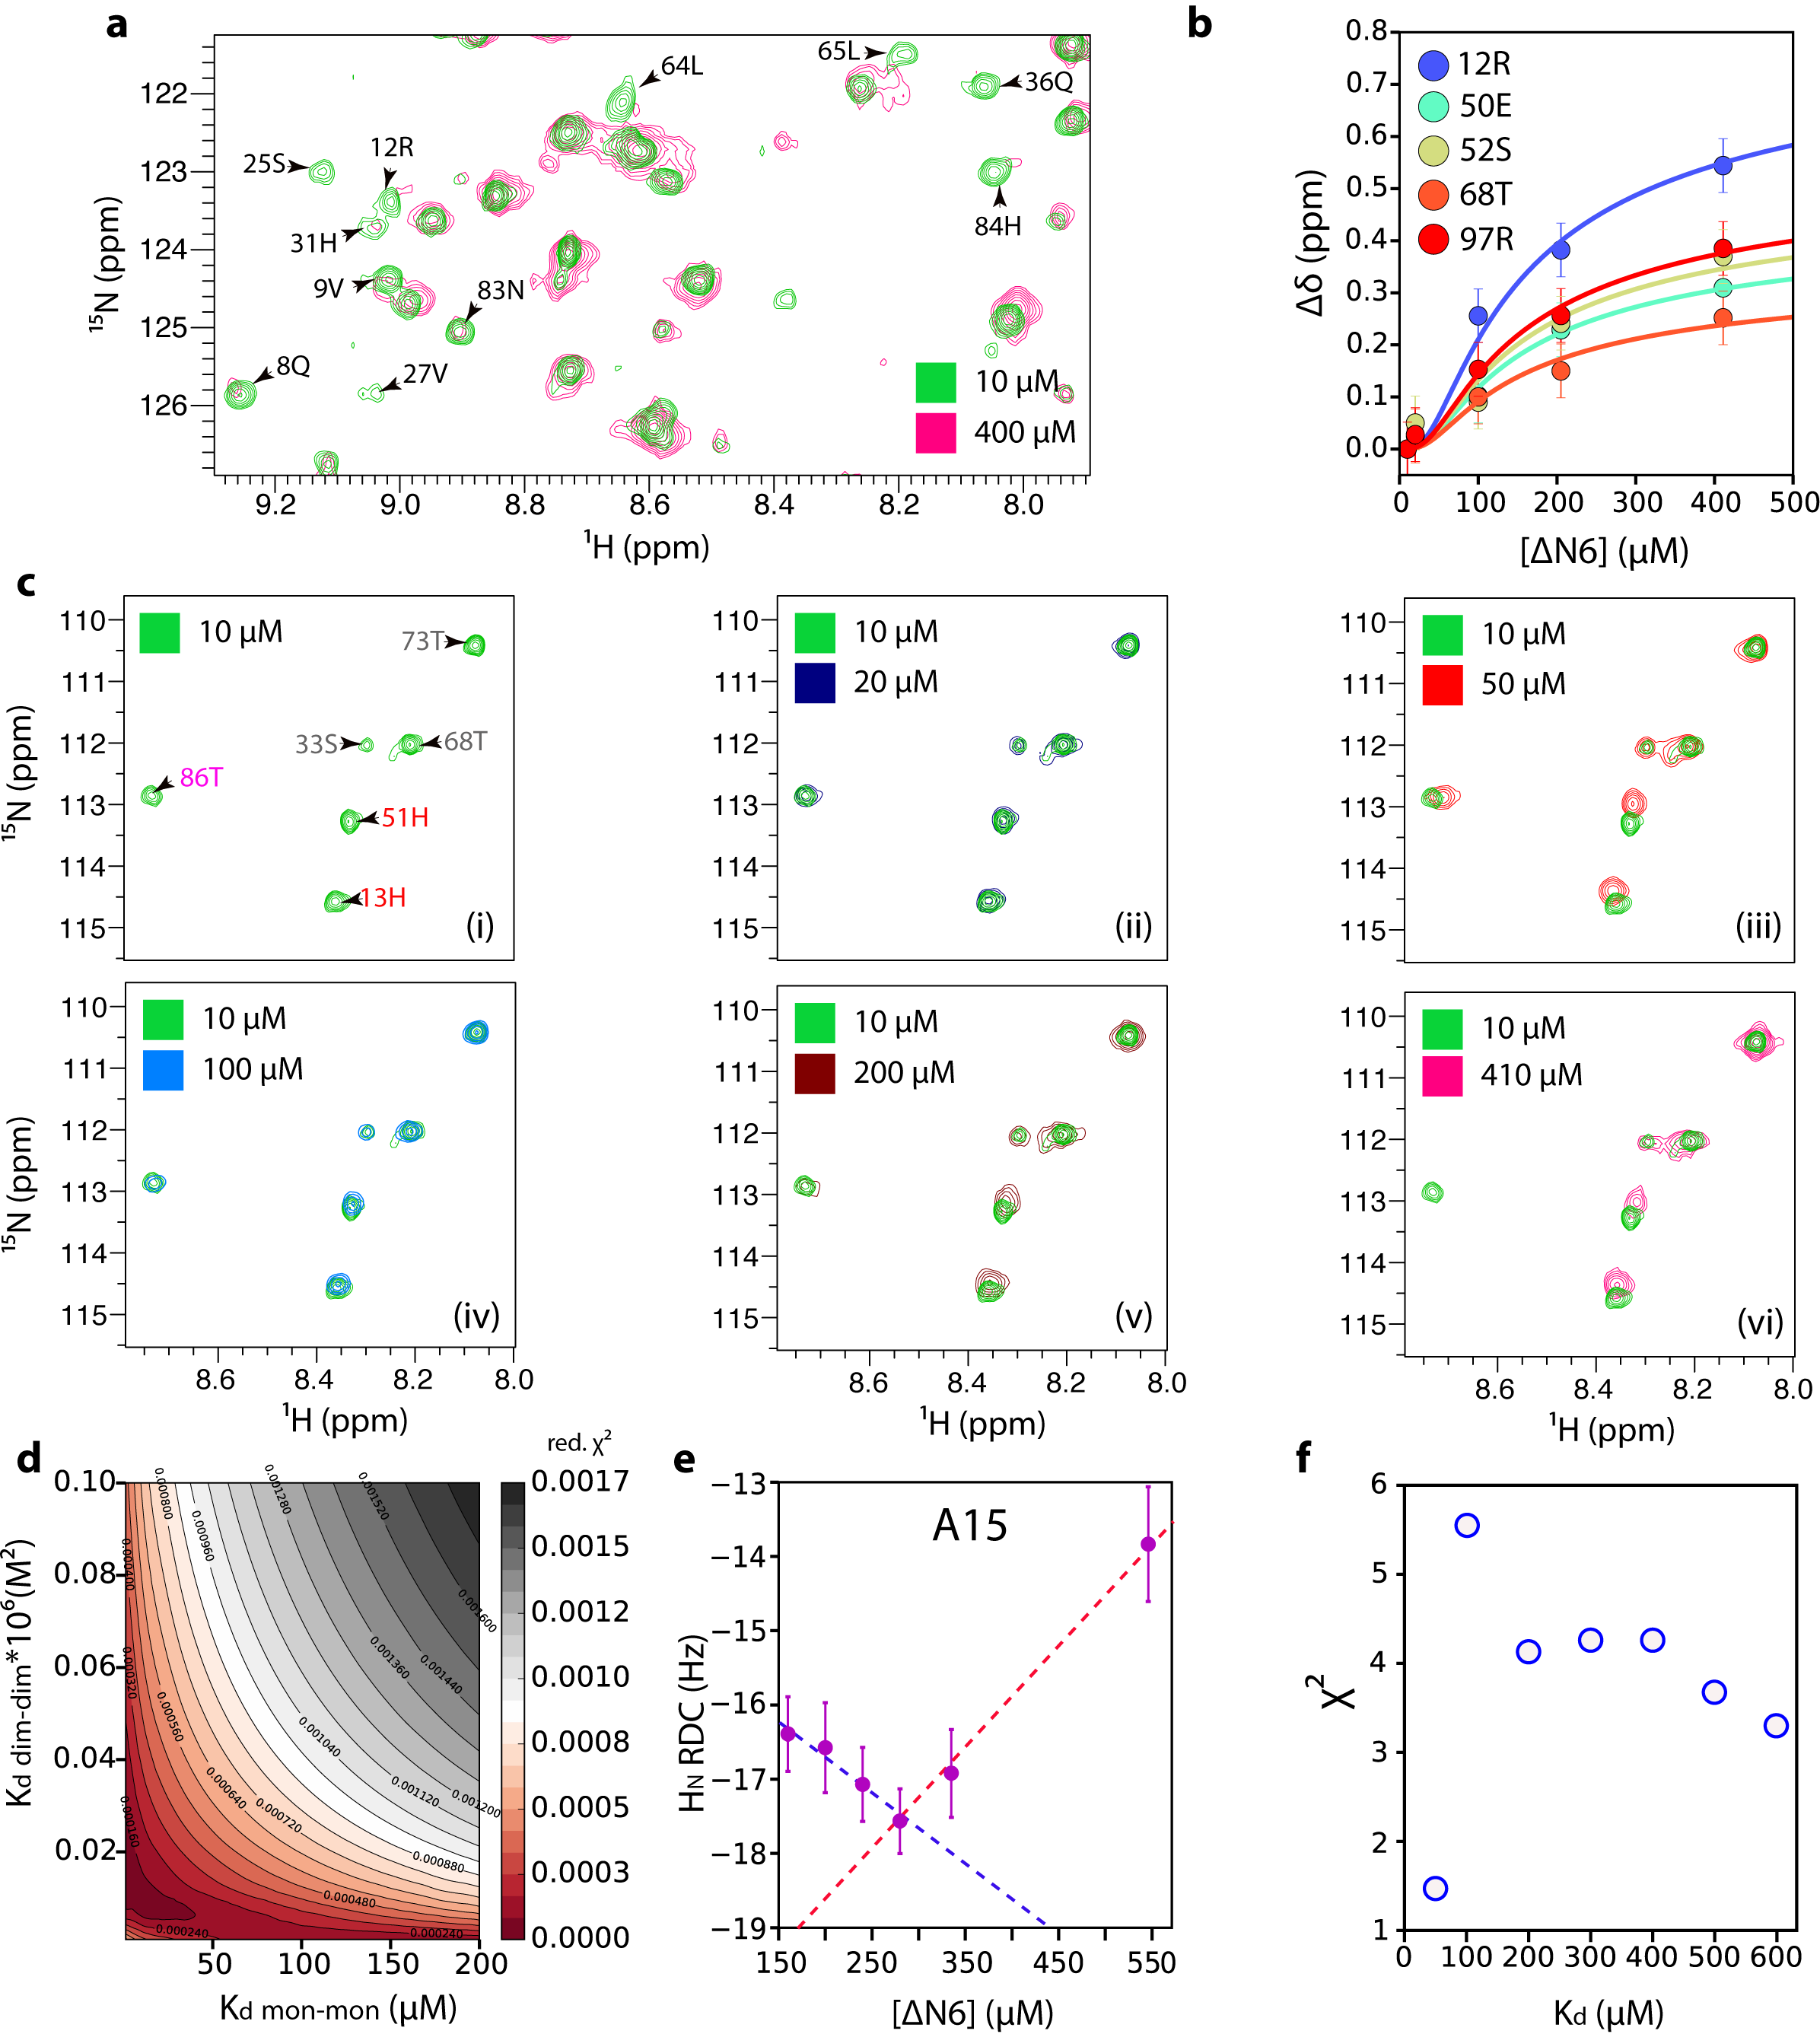

Supplement: supp [file elife-46574-supp-v1.zip › elife_poa_e46574_Figure_2_figure_supplement_2.tif]

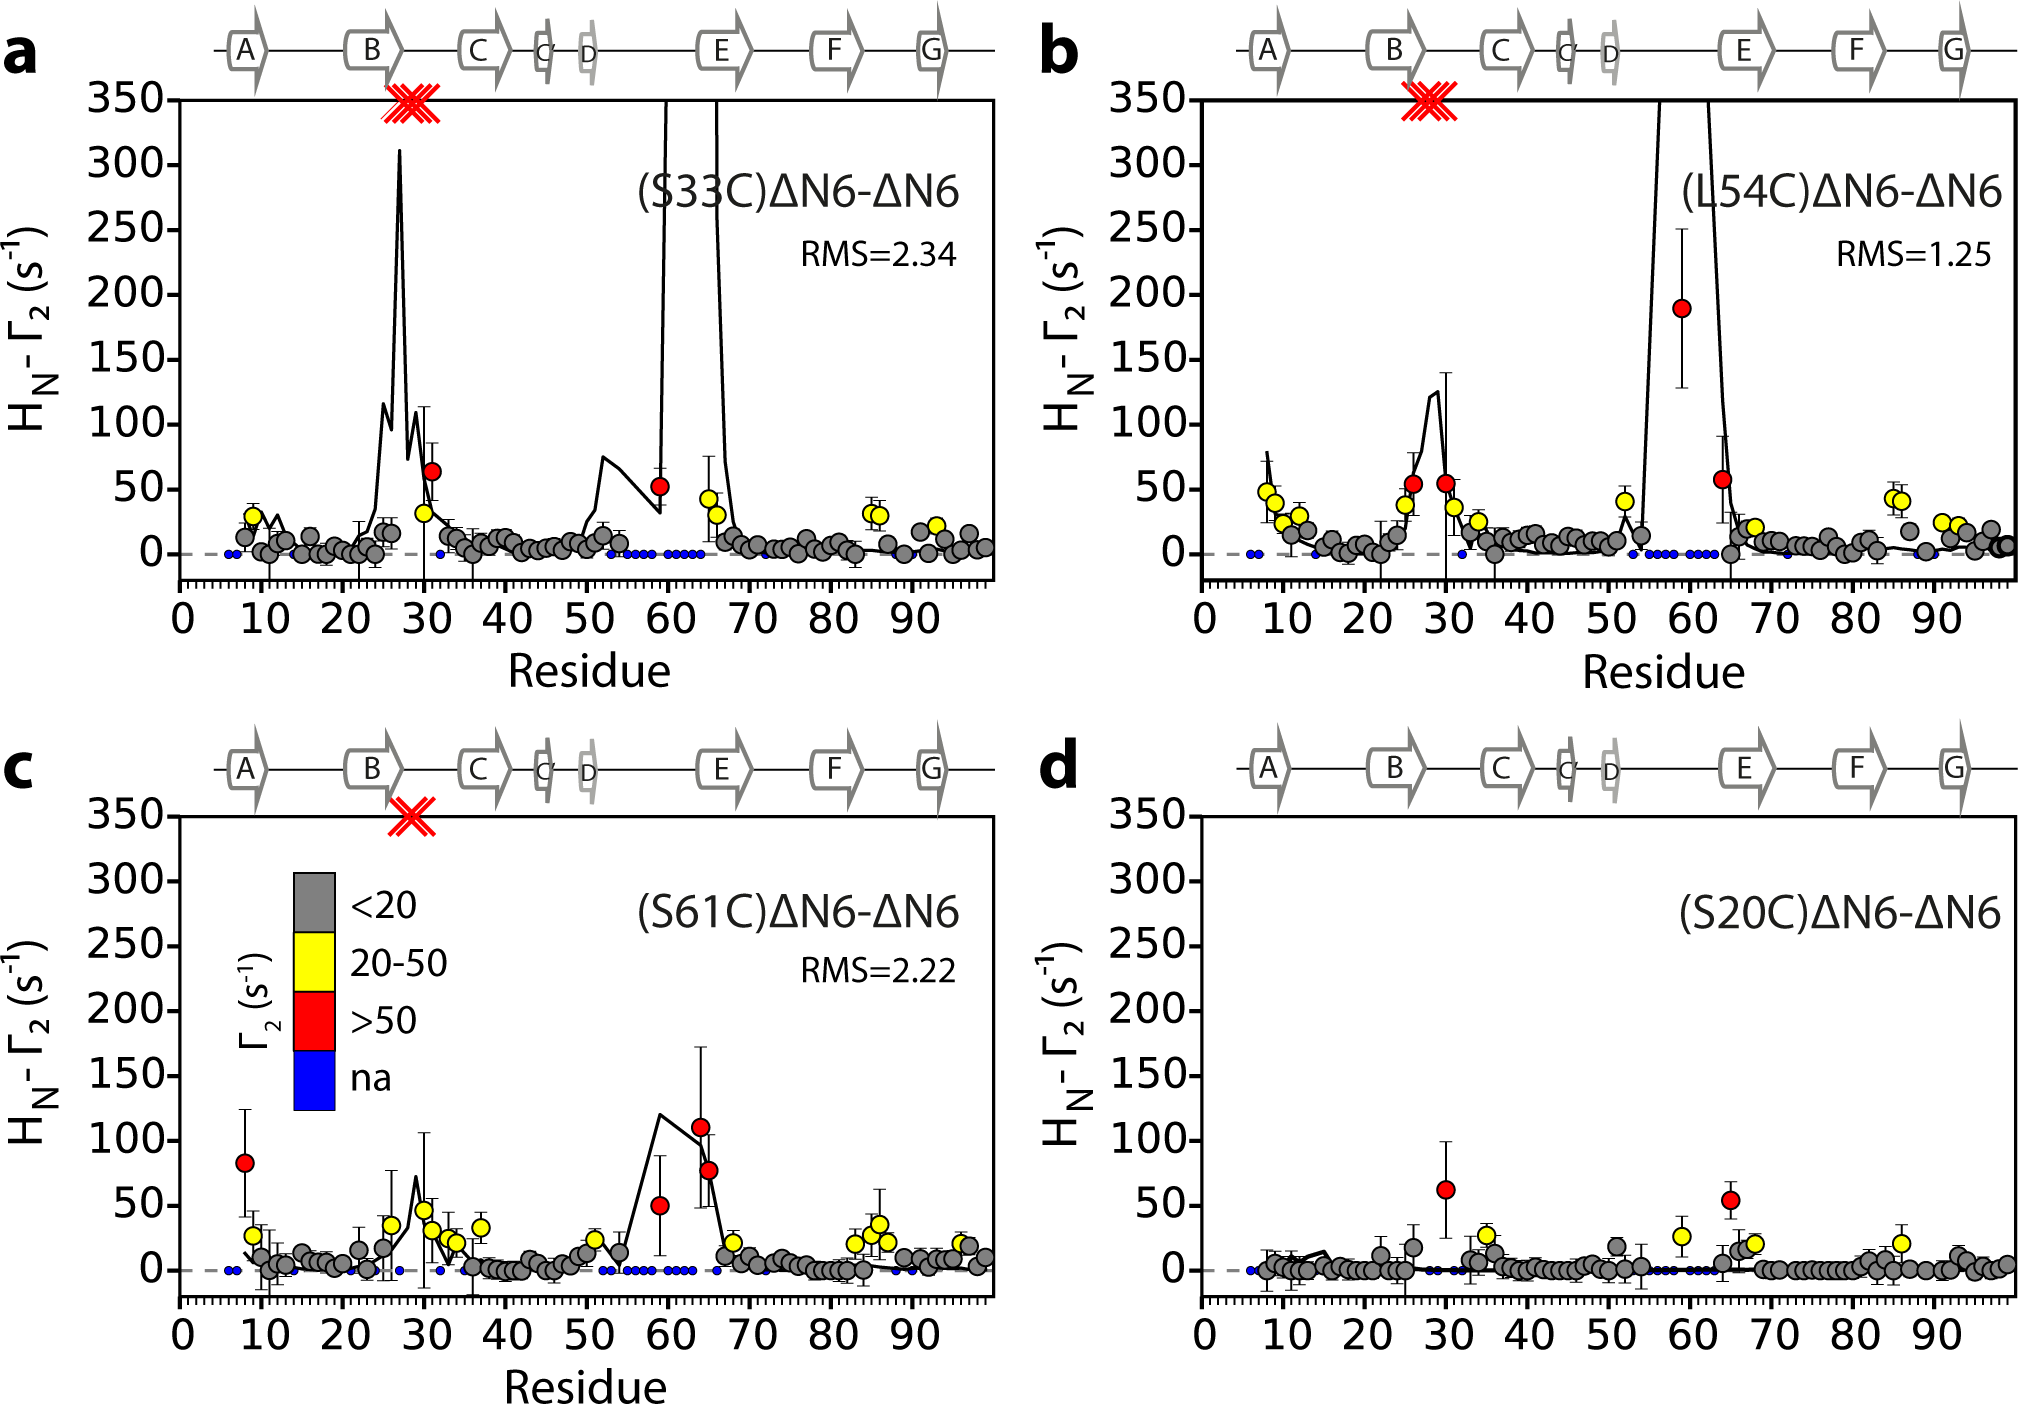

Supplement: supp [file elife-46574-supp-v1.zip › elife_poa_e46574_Figure_5_figure_supplement_4.tif]
